# Connectome Spatial Smoothing (CSS): concepts, methods, and evaluation

Sina Mansour L.<sup>1,\*</sup>, Caio Seguin<sup>2,3</sup>, Robert E. Smith<sup>4,5</sup>, and Andrew Zalesky<sup>1,2</sup>

<sup>1</sup>Department of Biomedical Engineering, The University of Melbourne, Parkville, Victoria, Australia

<sup>2</sup>Melbourne Neuropsychiatry Centre, Department of Psychiatry, The University of Melbourne and Melbourne Health, Parkville, Victoria, Australia

<sup>3</sup>The University of Sydney, School of Biomedical Engineering, Sydney, Australia

<sup>4</sup>The Florey Institute of Neuroscience and Mental Health, Heidelberg, Victoria, Australia

<sup>5</sup>Florey Department of Neuroscience and Mental Health, The University of Melbourne, Parkville, Victoria, Australia

\*To whom correspondence should be addressed. Email: [sina.mansour.lakouraj@gmail.com](mailto:sina.mansour.lakouraj@gmail.com)

(Dated: January 25, 2022)

## Abstract

Structural connectomes are increasingly mapped at high spatial resolutions comprising many hundreds—if not thousands—of network nodes. However, high-resolution connectomes are particularly susceptible to image registration misalignment, tractography artifacts, and noise, all of which can lead to reductions in connectome accuracy and test-retest reliability. We investigate a network analogue of image smoothing to address these key challenges. Connectome Spatial Smoothing (CSS) involves jointly applying a carefully chosen smoothing kernel to the two endpoints of each tractography streamline, yielding a spatially smoothed connectivity matrix. We develop computationally efficient methods to perform CSS using a matrix congruence transformation and evaluate a range of different smoothing kernel choices on CSS performance. We find that smoothing substantially improves the identifiability, sensitivity, and test-retest reliability of high-resolution connectivity maps, though at a cost of increasing storage burden. For atlas-based connectomes (i.e. low-resolution connectivity maps), we show that CSS marginally improves the statistical power to detect associations between connectivity and cognitive performance, particularly for connectomes mapped using probabilistic tractography. CSS was also found to enable more reliable statistical inference compared to connectomes without any smoothing. We provide recommendations on optimal smoothing kernel parameters for connectomes mapped using both deterministic and probabilistic tractography. We conclude that spatial smoothing is particularly important for the reliability of high-resolution connectomes, but can also provide benefits at lower parcellation resolutions. We hope that our work enables computationally efficient integration of spatial smoothing into established structural connectome mapping pipelines.

## Highlights:

- We establish a network equivalent of image smoothing for structural connectomes.
- Connectome Spatial Smoothing (CSS) improves connectome test-retest reliability, identifiability and sensitivity.
- CSS also facilitates reliable inference and improves power to detect statistical associations.
- Both high-resolution and atlas-based connectomes can benefit from CSS.

**Keywords:** Structural connectivity | Connectome smoothing | High-resolution connectomics | Tractography

## 1. Introduction

Spatial smoothing is widely recognized as a crucial preprocessing step in many neuroimaging pipelines. It can increase the signal-to-noise ratio (SNR) by eliminating the high-frequency spatial components of noise [1–5] and is typically used in different neuroimaging modalities such as structural mag-

netic resonance imaging (MRI) [6–8], functional MRI [9–13], positron emission tomography (PET) [14–17], magnetoencephalography (MEG) [18, 19], electroencephalography (EEG) [20], and functional near-infrared spectroscopy (fNIRS) [21, 22]. As a result, options for spatial smoothing are provided in many neuroimaging toolboxes, such as AFNI [23], FreeSurfer [24], FSL [25], and SPM [26].

16 Structural connectivity computed from diffusion  
17 MRI tractography can be used to construct structural  
18 connectomes [27–29], and there is considerable inter-  
19 est in performing statistical inference on this graph  
20 representation of the brain [30, 31]. However, unlike  
21 image-based statistical inference, such data are cur-  
22 rently not explicitly smoothed. Most structural con-  
23 nectomes are studied at the resolution of large-scale  
24 brain atlases comprising tens to hundreds of regions.  
25 The process of assigning tractography streamlines to  
26 such large-scale regions manipulates the data in a  
27 manner somewhat akin to smoothing. Nonetheless,  
28 the potential impact of additional (explicit) smooth-  
29 ing has not yet been evaluated. Moreover, given that  
30 connectomes are spatially embedded graphs, conven-  
31 tional univariate smoothing methods are not directly  
32 applicable to connectomes, and so smoothing meth-  
33 ods tailored to connectome data are required.

34 High-resolution connectomes are a subset of con-  
35 nectomes that investigate the connectivity struc-  
36 ture of the brain at the resolution of cortical ver-  
37 tices/voxels [32]. Recent studies highlight the ad-  
38 vantages of investigating structural connectomes at  
39 this higher spatial resolution than atlases with coarse  
40 parcellations [32–39]. For example, high-resolution  
41 structural connectivity maps robustly capture intri-  
42 cate local modular structures in brain networks and  
43 provide insightful connectome biomarkers of neural  
44 abnormalities [36, 37, 40]. We recently established  
45 a computationally efficient framework to map high-  
46 resolution structural connectomes, and found that  
47 these connectomes enabled accurate prediction of in-  
48 dividual behaviors and neural fingerprinting [32]. As  
49 part of this recent work, we implemented a prelimi-  
50 nary method for connectome smoothing, building on  
51 earlier structural connectome smoothing approaches  
52 [33].

53 In this study, we extend our earlier work by formal-  
54 izing the principles of Connectome Spatial Smooth-  
55 ing (CSS), aiming to develop efficient computational  
56 methods to facilitate connectome smoothing and de-  
57 termine optimal smoothing parameters. We investi-  
58 gate the impact of smoothing on high-resolution and  
59 atlas-based connectomes, quantifying its benefits for  
60 reliability, identifiability and statistical power. We  
61 anticipate that CSS will become a common step in  
62 connectome mapping workflows.

## 63 2. Materials and methods

### 64 2.1. Connectome Spatial Smoothing

65 Here, we develop an efficient and scalable method  
66 to enable smoothing of spatially-embedded high-  
67 resolution connectivity matrices. Unlike conventional  
68 spatial smoothing algorithms that are defined in  
69 terms of a single smoothing kernel, CSS is inher-  
70 ently bivariate and involves a pair of spatially dis-  
71 tant smoothing kernels operating at the two ends  
72 of each connection. The framework developed here

73 extends our recent work on high-resolution connec-  
74 tomes, where we first investigated the concept of  
75 connectome smoothing with a single kernel matrix  
76 [32]. We also acknowledge the seminal work of Besson  
77 and colleagues, who found that connectome smooth-  
78 ing improved the reliability of high-resolution con-  
79 nectomes [33], and other approaches in mapping con-  
80 tinuous high-resolution connectomes with an implicit  
81 form of connectivity spatial smoothing [38, 39].

82 We use  $A$  to denote the symmetric connectivity ma-  
83 trix inferred from tractography, with size  $v \times v$  where  
84  $v$  is the total number of network nodes and element  
85  $A(i, j)$  stores the streamline count between nodes  $v_i$   
86 and  $v_j$ . This matrix can be decomposed into two half-  
87 incidence matrices  $U$  and  $V$ , each of size  $v \times n$ , where  
88  $n$  is the total number of streamlines. These matrices  
89 encode the connectivity endpoint information, such  
90 that the streamline endpoint pairs are mapped to the  
91 columns of  $U$  and  $V$ . For instance, if the  $k$ th stream-  
92 line ends in nodes  $v_i$  and  $v_j$ , then the  $k$ th columns  
93 of  $U$  and  $V$  are vectors with a single non-zero ele-  
94 ment, with weight 1, respectively located at  $U(i, k)$   
95 and  $V(j, k)$ . This signifies that streamline  $k$  connects  
96 the endpoints  $v_i$  and  $v_j$ . Fig. 1A-C demonstrates the  
97 decomposition of streamlines encoded in a connectiv-  
98 ity matrix and the half-incidence matrix representa-  
99 tions. Mathematically, the symmetric connectivity  
100 matrix is decomposed as follows:

$$A = UV^T + VU^T \quad (1)$$

101 Since the columns of the half-incidence matrices  
102 each represent a single endpoint associated with a  
103 spatial coordinate, a conventional spatial smoothing  
104 kernel can be applied to those columns, resulting in  
105 a pair of smoothed half-incidence matrices  $U_s$  and  
106  $V_s$ . As previously derived [32], a smoothed connec-  
107 tivity matrix can be constructed by combining the  
108 smoothed half-incidence matrices as follows:

$$A_s = U_s V_s^T + V_s U_s^T \quad (2)$$

109 Here, we propose a simplification of this for-  
110 mulation, which leads to improved computational  
111 tractability. Let  $F_s$  denote a spatial smoothing ker-  
112 nel of size  $v \times v$ , such that column  $i$  of  $F_s$  stores the  
113 weights for a smoothing kernel spatially centered at  
114 the  $i$ th node of the network. This smoothing kernel  
115 can be used to compute the smoothed half-incidences:

$$\begin{aligned} U_s &= F_s U \\ V_s &= F_s V \end{aligned} \quad (3)$$

116 Smoothing can thus be represented as a linear  
117 transformation of each half-incidence matrix. Under  
118 this simplification, CSS reduces to a matrix congru-  
119 ence between the smoothed and initial connectivity  
120 matrices, which can be efficiently computed without  
121 using half-incidence matrices. Specifically, we have  
122 that:

$$\begin{aligned}
 A_s &= U_s V_s^T + V_s U_s^T \\
 &= F_s U V^T F_s^T + F_s V U^T F_s^T \\
 &= F_s A F_s^T
 \end{aligned} \quad (4)$$

123 This equation shows that the smoothed connectivity  
 124 matrix  $A_s$  is a congruent transformation of the initial connectivity  
 125 matrix  $A$ . Fig. 1D-F illustrates a simple example  
 126 of this transformation. This simplification improves the computational  
 127 feasibility since performing CSS is no longer dependent on the number of  
 128 streamlines  $n$  which is typically greater than the number of non-zero  
 129 connectome edges. The precise derivation of smoothing kernel matrix  $F_s$   
 130 is presented later in Section 2.6. Smoothing parameters.  
 131  
 132

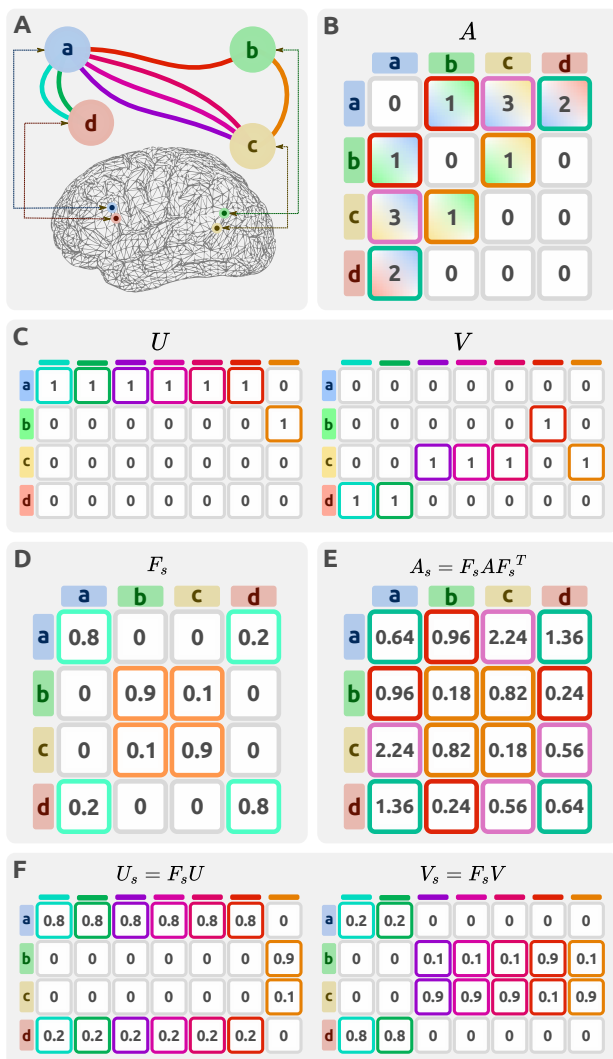

**Fig. 1.** Illustrative example demonstrating the decomposition of streamlines into connectivity and incidence matrices. (A) A hypothetical network in which 7 streamlines connect four brain regions/nodes. The nodes (a,d) and (b,c) are selected to be spatially proximal. (B) Matrix  $A$  encodes the network in a 4x4 connectivity matrix. (C) The network can be alternatively represented by two half-incidence matrices  $U$  and  $V$ . (D) A connectome smoothing kernel  $F_s$  can be defined based on the pairwise geodesic distances between nodes. (E,F) The network representations can be spatially smoothed using CSS to produce a smoothed connectivity matrix  $A_s$  or a pair of smoothed half incidence matrices  $U_s, V_s$ .

## 2.2. Study design

We investigated the impact of CSS on connectomes mapped at different node resolutions. As detailed below, high-resolution ( $\sim 60k$  nodes) and atlas-based ( $\sim 300$  nodes) connectomes were mapped for individuals using diffusion MRI and established whole-brain tractography methods. Data from two diffusion MRI acquisitions for each individual were used, enabling evaluation of test-retest reliability and identifiability across different smoothing parameters. Fig. 2 provides a brief overview of the study design. We next describe the diffusion MRI acquisition, whole-brain tractography and connectome mapping procedures, smoothing parameters, and the evaluation methodology used in this study.

## 2.3. Imaging data acquisition and pre-processing

Imaging data were sourced from the Human Connectome Project (HCP) [41, 42]. We obtained the diffusion and structural MRI images from the 42 healthy young adults comprising the HCP test-retest cohort. For these individuals, two separate imaging sessions were conducted across two different days, with the intervening period between the test and retest scans ranging from 18 to 343 days. These duplicate individual scans enabled the assessment of both intra- and inter-individual variations in the mapped connectivity information. Diffusion MRI data were acquired using a 2D spin-echo single-shot multiband EPI sequence with a multi-band factor of 3 and monopolar diffusion sensitization. The diffusion data consisted of three shells (b-values: 1000, 2000, 3000  $s/mm^2$ ) and 270 diffusion directions equally distributed within the shells, and 18 b=0 volumes, with an isotropic spatial resolution of 1.25mm [43]. We analyzed preprocessed diffusion data, where preprocessing was completed by the HCP team, using an established minimal preprocessing pipeline (v3.19.0). This included b=0 intensity normalization across scanning sessions, EPI and eddy-current-induced distortion corrections, motion correction, gradient nonlinearity correction, registration to native structural space, and masking the final data with a brain mask [44].

## 2.4. Connectome resolution

We mapped both high-resolution and atlas-based connectomes to evaluate the impact of CSS on different parcellation granularities. All high-resolution connectomes were mapped on the fsLR-32k standard surface mesh, comprising 32,492 vertices on each hemisphere [45]. This space is recommended for high-resolution cross-subject studies of diffusion MRI as it provides an accurate representation of the cortical surface with fewer vertices than the native mesh [44]. The combined left and right cortical surfaces consisted of 59,412 vertices after exclusion of the medial wall. This study used surface vertices as net-

189 work nodes for the high-resolution connectome, consistent with many previous high-resolution connectivity approaches [32, 34, 35, 39, 46, 47]; since alternative approaches have instead mapped connectomes on the faces of the surfaces [33, 36, 37], we explain their duality as well as how CSS can be applied to both implementations in Supplementary Information Section S.1. CSS for connectivity mapped on vertices vs. faces. The high-resolution maps were downsampled to a lower spatial resolution defined by the HCP-MMP1.0 atlas comprising 360 cortical regions [48]. The downsampling procedure is detailed in the Section 2.7. CSS for atlas-based connectivity. In brief, the high-resolution connectivity matrix was aggregated across all vertices belonging to each atlas region such that the connectivity weight between two atlas nodes was equal to the sum of the connectivity weights over all high-resolution vertices connecting those atlas nodes. The subcortex was not included in either high-resolution or atlas-based connectomes.

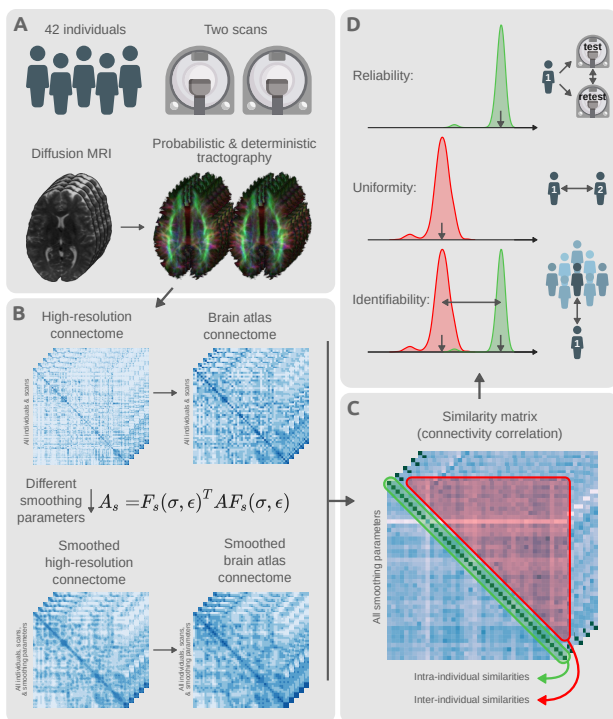

**Fig. 2.** Schema of study design and methodology. (A) Test-retest diffusion MRI scans of 42 individuals were sourced from the Human Connectome Project. This provided a duplicate scan of every individual. Probabilistic and deterministic tractography were utilized to estimate whole-brain white matter fiber trajectories for all individuals and scans. (B) Tractography results were used to map unsmoothed structural connectomes using the high-resolution fsLR-32k surface mesh. Different smoothing parameters were used to transform the unsmoothed high-resolution connectomes into various CSS smoothed alternatives. All variants of smoothed and unsmoothed connectomes were also downsampled to connectivity maps on the HCP-MMP1.0 brain atlas comprising 360 cortical regions [48]. (C) All mapped connectomes were used to evaluate the level of similarity between connectivity maps of different scans (test and retest) for each combination of parcellation resolution and set of smoothing parameters. Both intra- and inter-individual similarities were computed for all pairs of scans. (D) The computed similarities were used to evaluate the level of connectome reliability, uniformity, and identifiability: reliability quantifies the average similarity of connectomes belonging to scans of the same individual; uniformity quantifies the average conformity of connectomes belonging to different individuals; identifiability measures the extent to which scans of the same individuals are differentiable from the rest of the group.

## 2.5. Tractography and connectivity mapping

210 The impact of CSS was evaluated on both probabilistic and deterministic tractography algorithms. MR-  
211 trix3 software was used to perform tractography [49].  
212 An unsupervised method was used to estimate the  
213 white-matter (WM), grey-matter (GM), and cerebro-  
214 spinal fluid (CSF) response functions [50] for spherical  
215 deconvolution [51]. The fiber orientation distribution  
216 (FOD) in each voxel was estimated using a Multi-  
217 Shell, Multi-Tissue Constrained (MSMT) spherical  
218 deconvolution, which improves tractography at tissue  
219 interfaces [52]. The fsLR-32k surface mesh was  
220 used to generate a binary voxel mask at the interface  
221 between WM and cortical GM, from within which  
222 tractography streamlines were uniformly seeded at  
223 random coordinates from within this ribbon. Probabilistic  
224 tractography was performed by 2nd-order integration  
225 over fiber orientation distributions (iFOD2) [53].  
226 Deterministic tractography was performed using  
227 a deterministic algorithm that utilized the estimated  
228 FOD with a Newton optimization approach to locate  
229 the orientation of the nearest FOD amplitude peak  
230 from the streamline tangent orientation (“SD\_Stream”) [54].  
231 Five million streamlines were generated for each  
232 tractography method for each scan.

235 A streamlines propagation mask was generated using  
236 the intersection of voxels with non-zero white  
237 matter partial volume as estimated by FSL FAST  
238 [55] and voxels with non-zero sub-cortical grey matter  
239 volume as estimated by FSL FIRST [56]. The sub-  
240 cortical GM was included in the propagation mask to  
241 preserve long streamlines relaying through the sub-  
242 cortex, only terminating streamlines at the bound-  
243 aries of cortical GM or CSF. The streamline end-  
244 points were then mapped to the closest vertex of the  
245 individual’s WM surface mesh (fsLR-32k) according  
246 to the Euclidean distance metric (see Supplementary  
247 Information Section S.2. Considerations for endpoint  
248 assignment for further detail). Streamlines ending far  
249 from the cortical vertices (>2mm) were discarded.  
250 The remaining streamlines were used to generate a  
251  $59,412 \times 59,412$  high-resolution connectivity matrix  
252 for each of the two sessions for each individual. These  
253 data form the input for evaluation of CSS as described  
254 in the following sub-sections.

## 2.6. Smoothing parameters

256 The matrix of spatial smoothing kernels,  $F_s$ , deter-  
257 mines the spatial distribution of smoothing weights.  
258 We use a Gaussian function to define kernel weights,  
259  $G(\delta)$ , as a function of distance from the kernel center,  
260  $\delta$ , as given by:

$$G(\delta) = \frac{1}{(\sqrt{2\pi}\sigma)^k} e^{-\frac{\delta^2}{2\sigma^2}} \quad (5)$$

261 Where  $k$  is the dimension of the spatial kernel. The  
262 parameter  $\sigma$  is the standard deviation of the Gaus-  
263 sian distribution which determines the strength of

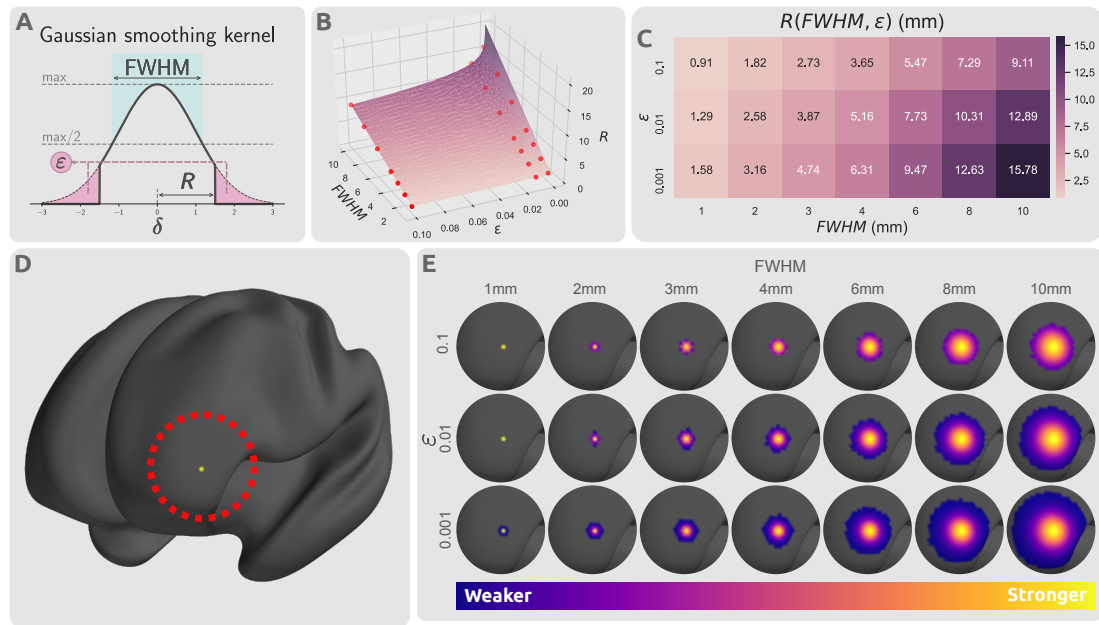

**Fig. 3.** Impact of kernel parameters on truncated kernels. (A) Distribution of a truncated Gaussian kernel with smoothing parameters FWHM,  $\epsilon$ , and  $R(\text{FWHM}, \epsilon)$ . FWHM determines the standard deviation of the Gaussian kernel,  $\epsilon$  dictates the proportion of the kernel that is truncated, and  $R$  determines the threshold radius beyond which the kernel is set to zero. The thick black line represents the smoothing kernel as a function of the smoothing parameters. (B) Smoothing parameter space of FWHM,  $\epsilon$ , and  $R$ . The parameter space plane shows the value of smoothing kernel radius  $R$  as a function of kernel standard deviation, FWHM, and truncation threshold,  $\epsilon$ . The radius is linearly related with FWHM, but log-linearly with the inverse of  $\epsilon$ . The red points indicate the selected smoothing parameters from the parameter space that were used in this study. (C) The values of kernel truncation radius at the respective smoothing parameters selected for FWHM and  $\epsilon$ . (D) A sample cortical vertex in the left frontal lobe of an inflated cortical mesh. (E) The respective column of the smoothing kernel  $F_s$  for the vertex shown in panel (D) with different smoothing parameter choices projected on the cortical surface.

264 smoothing. In this study, smoothing was applied to  
 265 the cortical surface mesh ( $k = 2$ ) and was quantified  
 266 by the geodesic distance over the surface mesh. This  
 267 geodesic distance metric indicates the shortest spatial  
 268 path between two points that is constrained to lie en-  
 269 tirely on the surface mesh [57]. Despite each subject  
 270 possessing the same set of vertices, the smoothing  
 271 kernel was computed separately for each scan, based  
 272 on the precise inter-vertex geodesic distances on the  
 273 white-matter surface mesh of each individual scan.

274 To compare the impact of different kernel standard  
 275 deviations, smoothing kernels were computed with 1,  
 276 2, 3, 4, 6, 8, and 10mm FWHM (full width at half  
 277 maximum) ( $\text{FWHM} = \sigma\sqrt{8\ln 2}$ ).

278 A second parameter that can impact smoothing is  
 279 *truncation* of the kernel. As the Gaussian distribu-  
 280 tion decays exponentially with distance, the kernel  
 281 is effectively zero for sufficiently large distances, and  
 282 so contributions can be ignored with minimal loss of  
 283 precision. Truncation results in a sparse smoothing  
 284 kernel, enabling computationally efficient smoothing  
 285 of high-resolution connectomes. Here we studied the  
 286 effect of the truncation threshold,  $\epsilon$ , which is defined  
 287 as the fraction of the kernel integral discarded as a re-  
 288 sult of kernel truncation (Fig. 3A): for each value of  
 289 FWHM, we generated three kernels for assessment,  
 290 corresponding to  $\epsilon = \{0.1, 0.01, 0.001\}$ . This trun-  
 291 cation can alternatively be expressed as a kernel ra-  
 292 dius  $R$  (which has benefits both conceptually and pro-  
 293 grammatically):

$$R(\text{FWHM}, \epsilon) = \text{FWHM} \sqrt{-\log_2 \epsilon} \quad (6)$$

294 Proof of this relationship is provided in the Sup-  
 295 plementary Information Section S.3. **Thresholding ra-  
 296 dius.**

297 Fig. 3A shows the influence of FWHM and  $\epsilon$  on  
 298 the truncated kernel. Fig. 3B,C show the relation-  
 299 ship between standard deviation, truncation thresh-  
 300 old and radius. Truncated kernels were generated  
 301 with nonzero kernel weights only at locations with  
 302 distance less than  $R(\text{FWHM}, \epsilon)$  from the kernel cen-  
 303 ter. Consequently, kernels were re-normalized such  
 304 that for every vertex the column sum of  $F_s$  was 1.0  
 305 despite truncation. **This step removes any artifacts  
 306 introduced by mesh vertex density variations (such  
 307 as amplification of signal in regions with high vertex  
 308 density).** Fig. 3D,E demonstrate the spatial distribu-  
 309 tion of a single row of this smoothing kernel over a  
 310 sample cortical surface mesh.

## 2.7. CSS for atlas-based connectivity

311 As described in Section 2.4. **Connectome resolu-  
 312 tion**, smoothed versions of the parcellation-based  
 313 atlas-resolution connectome can be computed by  
 314 first applying smoothing to the high-resolution con-  
 315 nectome, then aggregating the connectivity values  
 316 within the vertices corresponding to each atlas par-  
 317 cel. This approach however necessitates the high stor-  
 318 age and computational complexity demands of high-  
 319 resolution connectome data. We therefore derived a  
 320 more computationally efficient procedure to perform  
 321 CSS on atlas-based connectomes.

322 A brain parcellation atlas can be denoted by a bi-  
 323 nary  $p \times v$  matrix  $P$ , where  $p$  is the number of brain  
 324

regions in the atlas, such that the  $i$ th row of  $P$  is a binary mask of vertices belonging to the  $i$ th atlas region and each vertex belongs to at most one region (a “hard parcellation”). An atlas-based connectivity map  $A_p$  can be represented by the matrix multiplication  $A_p = PAP^T$ : this operation reduces the  $v \times v$  high-resolution connectivity  $A$  to a  $p \times p$  atlas connectivity map  $A_p$ . To smooth  $A_p$ , the high-resolution connectivity matrix  $A$  can be smoothed to  $A_s$  and then downsampled to create the smoothed atlas connectivity map  $A_{sp}$ . An equivalent approach is to first spatially smooth every row of the brain atlas  $P$ , and then normalize every column to produce a smoothed “soft parcellation”  $P_s = PF_s$ , where each region is now defined as a weighted probability map across vertices and vertices can have non-zero membership to multiple regions. This enables direct computation of smoothed parcellation-based connectome matrix  $A_{sp}$  without necessitating computation of the smoothed high-resolution connectome matrix  $A_s$  (see Supplementary Information Section S.4. CSS for atlas-based connectivity for detail):

$$\begin{aligned} A_{sp} &= PA_sP^T \\ &= PF_sAF_s^T P^T \\ &= (PF_s)A(PF_s)^T \\ &= P_sAP_s^T \end{aligned} \quad (7)$$

## 2.8. Connectome similarity

To evaluate the potential advantages of smoothing, a measure of similarity based on Pearson’s correlation was used to quantify the conformity of two connectivity maps [32, 58]. To compute the similarity between two networks  $A_1$  and  $A_2$ , first, Pearson’s correlation was computed for all respective rows of the connectivity matrices, yielding  $v$  correlation coefficients, each indicating the connectivity similarity of a single node; these correlations were then averaged over all nodes to produce a single value indicating the similarity of two connectomes. This measure was used to quantify both intra- and inter-individual connectome matrix similarities.

## 2.9. Evaluation metrics

Direct connectome comparisons were performed within each combination of: tractography algorithm (deterministic and probabilistic); parcellation resolution; and network smoothing parameters. Within each of these configurations, smoothed structural connectomes were generated independently for the two scanning sessions for each of 42 participants. For each scan in session 1, its similarity to every session 2 scan (1 intra-individual and 41 inter-individual) was computed; aggregated across all individuals, this process yielded 42 values comparing connectomes of the same individual (intra-individual similarities), and  $42 \times 41$  measuring the similarity between connectomes of different individuals (inter-individual similarities). The

intra-individual similarities were averaged to form a measure of connectome *reliability*  $\mu_{intra}$ , indicating the extent of consistency of mapped connectomes for an individual; similarly, the inter-individual similarities were averaged to yield a measure of population uniformity of the connectivity maps  $\mu_{inter}$ . Ideally, connectomes should be reliable (i.e. high  $\mu_{intra}$ ) and preserve inter-individual differences (i.e. low  $\mu_{inter}$ ). Hence, high reliability and low population uniformity is desirable.

To evaluate the extent to which an individual’s connectome is unique, we adopted an established identifiability framework [59]. *Identifiability* quantifies the extent to which an individual can be differentiated from a larger group based on a set of individual attributes. Here, identifiability was measured by the effect size of the difference in the means of intra-individual and inter-individual similarities [32]:

$$\text{identifiability} = \frac{|\mu_{intra} - \mu_{inter}|}{s} \quad (8)$$

Where  $\mu_{intra}$  and  $\mu_{inter}$  are the mean of the two intra- and inter-individual similarity distributions and  $s$  is the pooled standard deviation of the two distributions.

## 2.10. Evaluating statistical power with atlas-resolution smoothing

Generally, smoothing can result in a loss of effective spatial resolution, blurring, and shifting or merging of adjacent signal peaks [60–63], but is necessary to strike a compromise between sensitivity and specificity [64]. Hence, we investigated the impact of CSS on mass univariate significance testing of associations between cognitive performance and atlas-based structural connectivity. Given that structural connectiv-

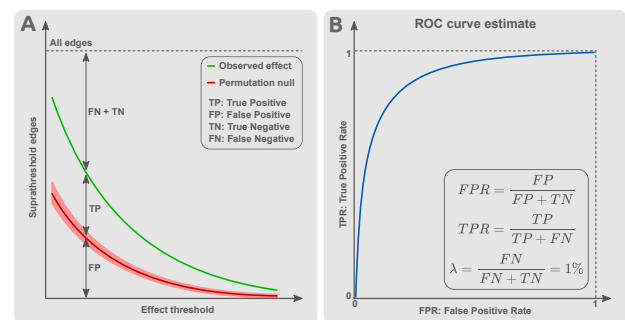

**Fig. 4.** Estimation of receiver operating characteristic (ROC) curves for mass univariate testing of associations between cognitive performance and structural connectivity. For each pair of regions in the parcellation atlas, Pearson’s correlation coefficient was used to test for an association between connectivity strength and a previously established measure of overall cognitive performance. (A) For a given effect size threshold (horizontal axis), the number of suprathreshold connections (vertical axis) yielded the combined number of true positives ( $TP$ ) and false positives ( $FP$ ), indicated by the green line. The red line indicates the total number of  $FP$ , determined by randomizing cognitive scores between individuals and recomputing all correlation coefficients (1000 randomizations; mean & 95% confidence interval shown). (B) Assuming a constant value for the false omission rate ( $\lambda = \frac{FN}{FN+TN} = 0.01$ ), an ROC curve can be estimated for different effect size (correlation coefficient) thresholds. TPR: true positive rate. FPR: false positive rate.

ity and cognition are known to be associated [32], we tested whether the use of CSS would improve power to detect such associations. For each pair of regions in the parcellation atlas, Pearson’s correlation coefficient was used to test for an association between connectivity strength and a previously established measure of overall cognitive performance [65]; This cognitive measure was generated from a data-driven behavioral dimension derived from independent component analysis (ICA) of 109 behavioral items. This yielded a correlation coefficient for each pair of regions. Age and sex were regressed out from the cognitive measure as confounds. This was repeated across 100 bootstrap tests each including 90% of the sample (N=35) to increase the robustness of the comparisons against individual effects.

To generate a distribution of correlation coefficients under the null hypothesis of an absence of association between connectivity and cognitive performance, we randomized cognitive scores between individuals and recomputed all correlation coefficients; this was repeated for 1000 randomizations (10 randomizations within each bootstrap sample), yielding 1000 correlation coefficients representing the null distribution for each connection. For a range of correlation coefficient thresholds from 0.1 to 0.5 (which indicate small to large effects according to Cohen’s conventions [66]), we counted the number of suprathreshold connections in both the empirical and randomized data (averaged across the 1,000 randomizations).

From these data, we generated an ROC (Receiver Operator Characteristic) curve as follows. The number of suprathreshold connections in the empirical data was assumed to give the combined number of true positives ( $TP$ ) and false positives ( $FP$ ), while the average total number of suprathreshold connections in the randomized data estimated the total number of  $FP$  (Fig. 4A). The combined number of false negatives ( $FN$ ) and true negatives ( $TN$ ) was determined by subtracting  $TP+FP$  from the total number of connections. Finally, since the true underlying effect was unknown, we assumed a false omission rate of 1%, i.e.,  $\lambda = \frac{FN}{FN+TN} = 0.01$ . This assumption enabled estimation of sensitivity ( $\frac{TP}{TP+FN}$ ) and specificity ( $\frac{TN}{TN+FP}$ ) that were used to generate the ROC

curve. We ensured that our estimates were robust to the choice of  $\lambda$  (see Supplementary Information Section S.5. Replication of ROC curve estimates for detail). This process was repeated independently for various smoothing kernels, and for data generated using both deterministic and probabilistic tractography algorithms, to investigate the impact of CSS on the statistical power to detect associations between cognitive performance and connectivity.

Additionally, we tested the replicability of the suprathreshold effects in a test-retest comparison to evaluate the replicability of the observations before and after smoothing. At each utilized threshold value, for every edge that was suprathreshold in the data from either session 1 or session 2, we calculated the difference in correlation coefficient between the two sessions. This provided a distribution of effect differences observed across a range of effect thresholds. Thus, a lower average effect difference indicated higher consistency of the connectivity-behavior observations and higher replicability of the findings.

### 3. Results

We investigated the utility of CSS for high-resolution and atlas-based connectomes, focusing on connectome reliability and identifiability as well as computational and storage requirements. We recommend optimal smoothing kernels for connectomes mapped with deterministic and probabilistic tractography, and we demonstrate that smoothing improves the statistical power to detect associations between connectivity and cognitive performance.

#### 3.1. High-resolution connectome storage size

High-resolution connectomes require considerable storage and computational resources, and CSS can increase this burden, due to reductions in matrix sparsity. Fig. 5 summarizes the sizes of stored connectomes for various kernels. Kernels with larger FWHM and/or more lenient truncation thresholds incur greater storage demands for high-resolution connectomes. We found that the kernel radius

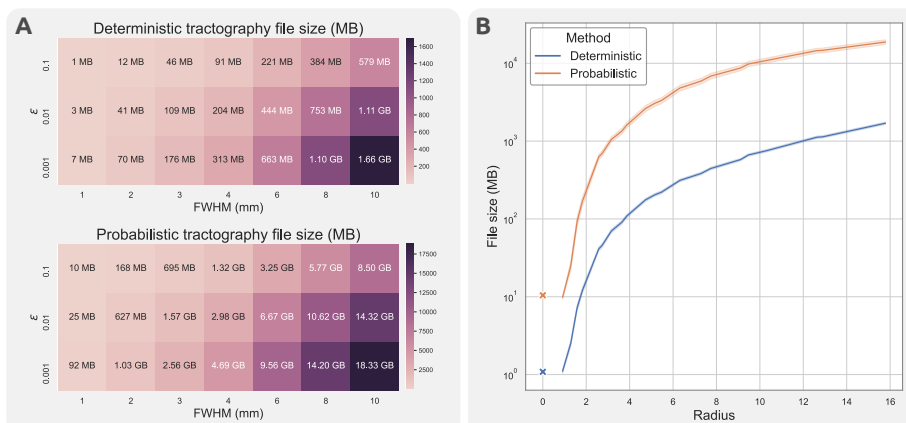

**Fig. 5.** Impact of CSS on connectome storage requirements. (A) Tables show the mean storage size of individual connectomes mapped using deterministic (upper) and probabilistic (lower) tractography following smoothing, as a function of truncation threshold and full-width at half maximum (FWHM) of smoothing kernel (B) The relationship between the kernel radius and file size of individual connectomes. Results for connectomes with no smoothing are marked with an x. File sizes are plotted using a logarithmic scale. Shaded bands indicate one standard deviation from the mean.

494  $R(\text{FWHM}, \varepsilon)$ , which is dependent on both parameters, was a reasonable predictor of connectome size.  
 495  
 496 We also observed that connectomes mapped using probabilistic tractography were approximately an order  
 497 of magnitude larger than their deterministic counterparts both prior to smoothing ( $\sim 10\text{MB}$  for probabilistic  
 498 and  $\sim 1\text{MB}$  for deterministic) and after performing CSS with identical smoothing parameters.  
 501

### 502 3.2. Identifiability and reliability

503 Fig. 6 summarizes the impact of CSS on the identifiability and reliability of high-resolution structural  
 504 connectivity maps. We observed that both larger FWHM values and smaller truncation thresholds (i.e.,  
 505 larger  $R$  in both cases) consistently improved connectome reliability (mean intra-subject similarity).  
 506 While high-resolution connectomes without smoothing had a relatively low reliability ( $\mu_{\text{intra}} < 0.2$ ), CSS  
 507 with kernels as little as 3-4mm FWHM resulted in a substantial increase in reliability ( $\mu_{\text{intra}} > 0.5$ ), with  
 508 reliability exceeding 90% ( $\mu_{\text{intra}} > 0.9$ ) achieved in some scenarios.  
 509

510  
 511 CSS also impacted connectome identifiability. We observed that while CSS with a 2-4mm FWHM kernel  
 512 improved the identifiability of connectomes, CSS with larger FWHM was detrimental for individual identifiability,  
 513 such that CSS with a 10mm FWHM resulted in more than 50% reduction in identifiability. For  
 514 both identifiability and reliability measures, CSS was more sensitive to a change in kernel FWHM in contrast  
 515 to the truncation threshold  $\varepsilon$ . Increasing the  
 516  
 517  
 518  
 519  
 520  
 521  
 522  
 523

524 truncation threshold from  $\varepsilon = 0.01$  to  $\varepsilon = 0.001$  had negligible impact on either measure.  
 525

526 Tractography algorithm choice also impacted reliability and identifiability. High-resolution connectomes  
 527 mapped using deterministic tractography had relatively lower reliability (10-20% lower), but higher  
 528 identifiability (20-30%), compared to their probabilistic counterparts with identical CSS parameters.  
 529  
 530

531 Fig. 7 shows the impacts of CSS with different kernel parameters on an atlas-parcellation-based structural  
 532 connectome. In agreement with the high-resolution analyses, we observed both that increases in FWHM and  
 533 decreases in kernel truncation thresholds led to improved connectome reliability, and that this improvement  
 534 in reliability comes at the expense of reduced identifiability. Without CSS, the atlas-based connectomes  
 535 were already relatively reliable (deterministic: 92%, probabilistic: 98%). Use of the largest smoothing kernel  
 536 increased these to 97% and 99%, respectively, albeit at the cost of a small reduction in identifiability  
 537 (from 7.8 to 7.2 for deterministic and from 6.8 to 6.1 for probabilistic). Changing kernel extent from  
 538  $\varepsilon = 0.01$  to  $\varepsilon = 0.001$  again had no considerable impact on reliability or identifiability. The  
 539 magnitude of influence of CSS on the atlas-resolution connectomes was comparatively smaller than the  
 540 effects observed at the higher resolution.  
 541  
 542  
 543  
 544  
 545  
 546  
 547  
 548  
 549  
 550  
 551

552 All in all, we observed that the advantages of CSS for high-resolution were maximized with 3-6mm  
 553 FWHM kernels; larger smoothing kernels ( $>6\text{mm}$  FWHM) could deteriorate high-resolution identifiability.  
 554  
 555

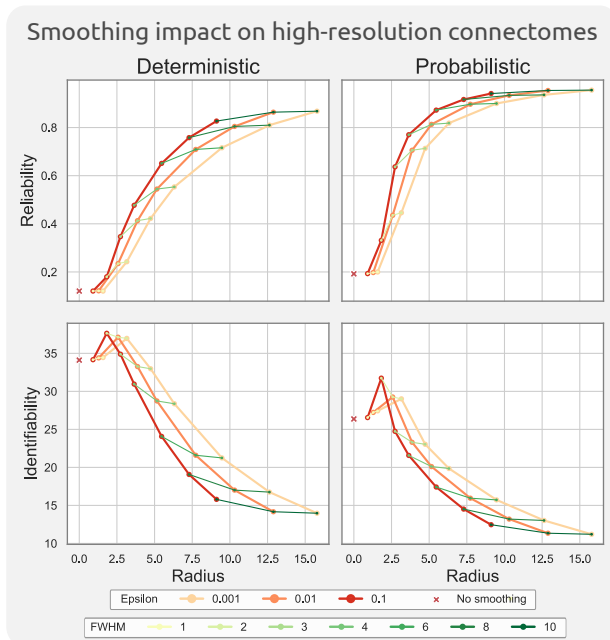

503 **Fig. 6.** Impact of CSS on high-resolution connectomes for a range of different kernel parameters. Reliability (first row) and  
 504 identifiability (second row) are reported for deterministic (left column) and probabilistic (right column) structural connectomes  
 505 mapped at the resolution of cortical vertices. Results for connectomes with no smoothing are marked with an x in each plot. Kernel  
 506 truncation thresholds,  $\varepsilon$ , are colored using warm colors such that each line connects points with equal  $\varepsilon$ ; similarly, FWHM is colored  
 507 using shades of green.

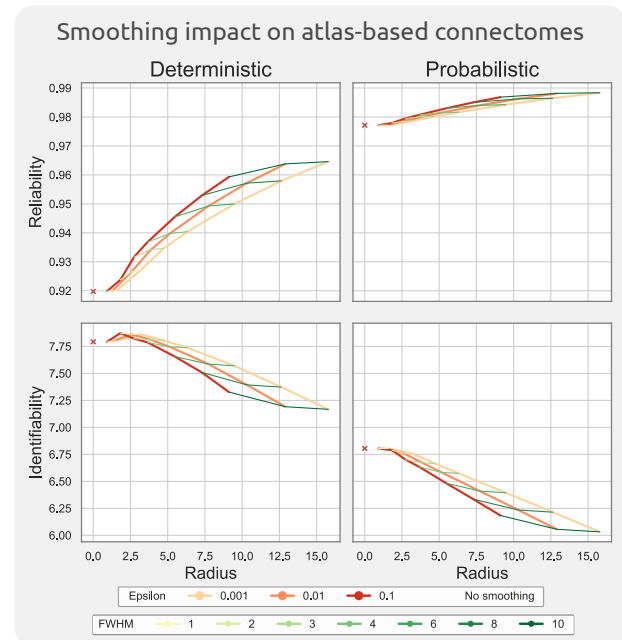

524 **Fig. 7.** Impact of CSS on atlas-based connectomes, for a range of different kernel parameters. The connectome reliability (first row)  
 525 and identifiability (second row) are reported for deterministic (left column) and probabilistic (right column) structural connectomes  
 526 mapped at the resolution of atlas parcels. The unsmoothed atlas-based connectivity results are marked with x in each plot. Kernel  
 527 truncation thresholds,  $\varepsilon$ , are colored using warm colors such that each line connects points with equal  $\varepsilon$ ; similarly FWHM is colored  
 528 using shades of green.



556 bility for the sake of reliability. In contrast, identi- 587  
 557 fiability of the atlas-resolution maps were less sensi- 588  
 558 tive to larger smoothing kernels, and thus kernels 589  
 559 of 6-10mm FWHM can be used to improve reliabil- 590  
 560 ity with proportionally smaller losses in identifiabil- 591  
 561 ity. To achieve similar reliability and identifiability, 592  
 562 connectomes generated using deterministic tractogra- 593  
 563 phy were found to require CSS with larger smoothing 594  
 564 kernels compared to their probabilistic counterparts. 595  
 565 Finally, it should be noted that the optimal CSS ker- 596  
 566 nel parameters essentially depend on the application 597  
 567 for which the connectome will be used.

### 568 3.2.1. Case Study: Impact of CSS on statistical 569 570 power

570 Finally, we investigated whether CSS can improve 571  
 572 statistical power to detect associations between struc- 573  
 574 tural connectivity and cognitive performance. For 575  
 576 this study we used  $\text{FWHM} = 8\text{mm}$  and  $\epsilon = 0.01$ , 577  
 578 based on the results reported above. For this case 579  
 579 study, we considered the mapped atlas-based connect- 580  
 581 omes and computed Pearson's correlation coefficient 582  
 582 between streamline counts and cognitive performance 583  
 583 for each pair of regions. ROC curves were then com- 584  
 584 puted for each case, as described in the Methods, to 585  
 585 determine whether CSS improved statistical power to 586  
 586 identify associations between connectivity and cogni- 587  
 587 tive performance.

583 First, we tested whether the magnitude of effect 584  
 584 in the set of suprathreshold connections (i.e., connec- 585  
 585 tions with a correlation coefficient exceeding a fixed 586  
 586 threshold) were replicable between the test and retest

587 datasets. We found that CSS improved replicability 588  
 588 in suprathreshold connections, particularly more so 589  
 589 for connectomes mapped with probabilistic tractog- 590  
 590 raphy (Fig. 8A); this suggests that CSS can improve 591  
 591 the reproducibility of mass univariate testing on con- 592  
 592 nectomes.

593 Next, we enumerated the number of suprathresh- 594  
 594 old connections as a function of the effect thresh- 595  
 595 old (Fig. 8B). While the proportion of suprathresh- 596  
 596 old connections increases following smoothing for the 597  
 597 empirical data, indicating a potential gain in sensi- 598  
 598 tivity, a similar increase in the randomized (null 599  
 599 distribution) data suggests that this may come at 600  
 600 the expense of poorer specificity. For connectomes 601  
 601 mapped with deterministic tractography, the num- 602  
 602 bers of suprathreshold connections for the empiri- 603  
 603 cal and randomized data are separated by a compar- 604  
 604 able gap, irrespective of whether CSS was perfor- 605  
 605 med. For probabilistic tractography, the number 606  
 606 of suprathreshold connections for the randomized 607  
 607 data was comparable with and without smoothing, 608  
 608 whereas CSS resulted in a substantially greater pro- 609  
 609 portion of suprathreshold connections for the empiri- 610  
 610 cal data. This suggests that CSS can improve the 611  
 611 statistical power of mass univariate testing perfor- 612  
 612 med on connectomes mapped with probabilistic tractog- 613  
 613 raphy, without a substantial loss in specificity.

614 To further investigate these effects, we consid- 615  
 615 ered precision ( $\frac{TP}{TP+FP}$ ) as a function of effect size 616  
 616 threshold (Fig. 8C); and from this, generated ROC 617  
 617 curves (Fig. 8D). Performing CSS on connectomes 618  
 618 mapped from probabilistic tractography improves the 619  
 619 precision and sensitivity of the inference. This im-

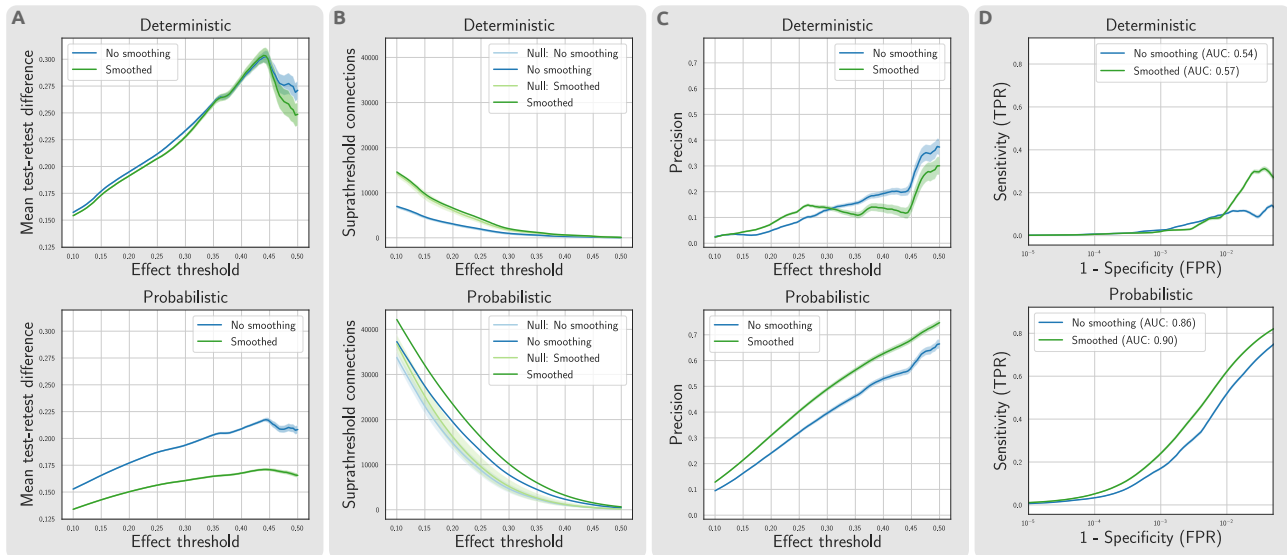

**Fig. 8.** Impact of CSS on statistical power of mass univariate testing on atlas-based connectomes, based on an exemplar dataset examining correlations between structural connectivity and cognitive performance. (A) Replicability of suprathreshold connections between test and retest datasets: a lower difference of the observed effect magnitude between test and retest is favorable in terms of replicability. (B) The number of suprathreshold connections as a function of the effect size threshold was compared with a null distribution from permutation. To assess the predictive utility of the connectomes, precision, sensitivity, and specificity was estimated from a comparison with the null. (C) Precision was calculated from the ratio of supra-threshold edges found in empirical data compared to the null model at different effect thresholds. (D) ROC curves were estimated to demonstrate the respective changes in sensitivity ( $TPR = \frac{TP}{TP+FN}$ ) and specificity ( $1 - FPR = \frac{TN}{TN+FP}$ ) of the edges selected at different effect thresholds. The analyses were repeated across bootstrap samples to provide a robust estimate of statistical power. Shaded lines indicate 95% confidence intervals. The Area Under Curve (AUC) metric was reported to facilitate performance comparison. Abbreviations: TP: True Positive, FP: False Positive, TN: True Negative, FN: False Negative, TPR: True Positive Rate, FPR: False Positive Rate.

620 improvement is also partially observed for connectomes  
621 mapped from deterministic tractography only for  
622 smaller effect thresholds ( $r < 0.3$ ). Taken together,  
623 these results suggest that CSS is particularly bene-  
624 ficial to improving the statistical power of inference  
625 performed on connectomes mapped with probabilistic  
626 tractography; in contrast, for connectomes mapped  
627 with deterministic tractography, the benefit of CSS  
628 is marginal and possibly detrimental for larger effect  
629 size thresholds ( $r > 0.3$ ). More importantly, CSS  
630 improved replicability with minimal impact on the  
631 statistical power for connectomes mapped with both  
632 tractography algorithms.

## 633 4. Discussion

634 In this study, we established a computationally  
635 efficient formalism for connectome smoothing and  
636 demonstrated that our Connectome Spatial Smooth-  
637 ing (CSS) method can benefit the analysis of atlas-  
638 based and high-resolution connectomes. Our results  
639 demonstrate that CSS impacts different aspects of  
640 connectivity mapping analyses, including individual  
641 reliability, inter-individual variability, and the inter-  
642 scan replicability of brain-behavior statistical asso-  
643 ciations, as well as computational storage demands.  
644 The choice of smoothing kernel parameters involves  
645 a trade-off between connectome sensitivity and speci-  
646 ficity: larger kernels (higher FWHM and lower  $\epsilon$ ) im-  
647 prove connectome sensitivity, but are detrimental to  
648 connectome specificity. It is therefore important to  
649 select a level of smoothing that strikes a balance be-  
650 tween these competing factors. In the following sec-  
651 tions, we provide some guidelines for selecting optimal  
652 smoothing parameters and discuss the implications of  
653 performing CSS for connectome reliability, identifi-  
654 ability, storage requirements, and statistical power.

### 655 4.1. *Appropriate smoothing parameters*

656 Our results indicate that CSS differentially affects  
657 the characteristics of structural connectivity matri-  
658 ces mapped with different tractography methods and  
659 parcellation resolutions. Although we cannot sug-  
660 gest a one-size-fits-all smoothing kernel, our find-  
661 ings can guide selection of appropriate CSS smooth-  
662 ing kernels in future studies. Table 1 provides some  
663 rules of thumb for selecting a level of spatial smooth-  
664 ing which aims to achieve a balance between reli-  
665 ability and identifiability, while also considering  
666 storage demands. In general, high-resolution con-  
667 nectomes benefit from smaller FWHM compared to  
668 atlas-based connectomes, and deterministic maps re-  
669 quire larger FWHM than their probabilistic counter-  
670 parts to achieve the same level of reliability. However,  
671 the goals of the analysis at hand must be considered  
672 when selecting the level of smoothing. For example,  
673 if the goal is to identify an individual from a group  
674 based on their connectome, deterministic tractogra-  
675 phy and a smaller FWHM than recommended in Ta-

676 ble 1 may be desirable. On the other hand, if one  
677 wishes to build a reliable consensus structural con-  
678 nectome that is robustly consistent across individu-  
679 als, a higher FWHM than recommended in Table 1  
680 may be favored. A value of 0.01 is suggested univer-  
681 sally for the kernel truncation threshold  $\epsilon$ , as smaller  
682 thresholds yield negligible impacts on identifiability  
683 and reliability whilst incurring much greater storage  
684 costs.

685 Without CSS, connectomes mapped from deter-  
686 ministic tractography were found to yield higher  
687 identifiability; conversely, connectomes mapped from  
688 probabilistic tractography were more reliable. This is  
689 in line with previous reports suggesting that proba-  
690 bilistic tractography achieves higher sensitivity, lower  
691 specificity, and lower interindividual variability, com-  
692 pared to deterministic approaches [67–70]. Given  
693 that many factors other than reliability and identi-  
694 fiability would affect the choice of tractography al-  
695 gorithm, we suggest that CSS could be leveraged to  
696 achieve a balance between reliability and identifiabil-  
697 ity of the selected tractography algorithm. Hence, we  
698 could take advantage of a comparatively larger kernel  
699 for deterministic tractography approaches to match  
700 the reliability and identifiability of the probabilistic  
701 counterpart.

| Recommended          |               | FWHM | $\epsilon$ | $R$  |
|----------------------|---------------|------|------------|------|
| smoothing parameters |               |      |            |      |
| High-<br>resolution  | Probabilistic | 3mm  | 0.01       | 4mm  |
|                      | Deterministic | 6mm  | 0.01       | 8mm  |
| Atlas                | Probabilistic | 8mm  | 0.01       | 10mm |
|                      | Deterministic | 8mm  | 0.01       | 10mm |

**Table 1.** Recommended smoothing parameters. This table provides rule of thumb recommendations for CSS smoothing kernels of different variants of structural connectomes. In general, connectomes at the resolution of a brain atlas can benefit from larger CSS kernels compared to high-resolution connectomes. High-resolution connectomes computed from probabilistic tractography are advised to be smoothed less than their deterministic counterparts. Reducing epsilon below 0.01 is unfavorable and computationally costly. The rounded values for kernel radius  $R$ (FWHM,  $\epsilon$ ) provide sensible approximations.

702 Our results highlight that CSS is a critical step  
703 to improving the reliability of high-resolution connec-  
704 tomes. High-resolution connectivity mapping is par-  
705 ticularly sensitive to noise, artefacts, and registration  
706 misalignment, all of which can be alleviated—to a cer-  
707 tain extent—with the new CSS formalism developed  
708 here.

### 709 4.2. *Connectome reliability*

710 Structural connectivity maps are commonly used in  
711 research to draw statistical inferences regarding as-  
712 sociations between brain connectivity and different  
713 aspects of human cognition, behavior, and mental  
714 health [71–76]. The statistical power of such infer-  
715 ences can depend on the reliability of the measure un-  
716 der study: a connectivity measure that can be reliably  
717 assessed for all individuals can potentially improve

718 the characterization of brain-behavior associations.  
719 However, improvements in reliability achieved by in-  
720 creasing the level of smoothing come at the expense  
721 of poorer spatial specificity and increases in connec-  
722 tome storage and computational requirements. CSS  
723 enables researchers to balance this trade-off to match  
724 the goals of the analysis at hand. Commonly used  
725 atlas-based connectivity maps are comparatively reli-  
726 able, even without any smoothing, since the reduced  
727 spatial resolution of inter-subject correspondence im-  
728 posed by a parcellation performs an operation com-  
729 parable to smoothing. Nevertheless, we found that  
730 CSS could marginally improve the reliability of atlas-  
731 based connectomes.

#### 732 4.3. Individual identifiability

733 The concept of neural fingerprinting has emerged in  
734 recent years which considers the challenge of identi-  
735 fying an individual from within a large group of oth-  
736 ers, based on their connectome or other neuroimaging  
737 data [58]. While the efficacy of a measure at indi-  
738 vidual identification does not necessitate existence of  
739 behavioral and pathological biomarkers in individu-  
740 als, it could still be conceived as an indicator of the  
741 strength of such individual brain-behavior associa-  
742 tions. By reducing the impact of noise and registra-  
743 tion misalignments, CSS can enhance detection of  
744 individual differences in connectivity maps, enabling  
745 clearer differentiation of individuals and thus poten-  
746 tially improve the accuracy of neural fingerprinting.  
747 Our findings suggest that a minimal smoothing ker-  
748 nel of 2mm FWHM improves both reliability and  
749 identifiability of high-resolution connectivity matri-  
750 ces. Implementing CSS with larger kernels (i.e.  $>$   
751 2mm FWHM) further enhances connectome reliabil-  
752 ity substantially, but results in a gradual reduction in  
753 identifiability due to loss of individual identifiers by  
754 spatial blurring. Smoothing the high-resolution con-  
755 nectivity maps beyond 6mm FWHM is unnecessary  
756 because gains in reliability diminish, despite detri-  
757 mental impacts on identifiability, spatial specificity,  
758 and storage requirements.

#### 759 4.4. Storage requirements

760 It is important to consider the storage demands  
761 and associated computational burdens of handling  
762 smoothed connectome data. If the connectome size is  
763 larger than a gigabyte or so, handling the file (load-  
764 ing into memory and conducting analyses) can become  
765 unacceptably time-consuming. Even with the assis-  
766 tance of high-performance computing infrastructure,  
767 any benefits of using connectomes larger than a few  
768 gigabytes might not outweigh the time and resources  
769 required to process the larger files. This especially  
770 limits the extent of smoothing for connectomes gener-  
771 ated using probabilistic tractography, which can grow  
772 to more than a few gigabytes when smoothed above  
773 4-6mm FWHM. In contrast, connectomes mapped  
774 with deterministic tractography can be smoothed fur-

ther whilst remaining highly computationally feasi- 775  
ble. Nevertheless, if greater smoothing is essential 776  
in a study, a high-performance computing platform 777  
with access to adequate memory can be used to pro- 778  
cess smoothed connectomes (potentially without use 779  
of sparse matrix data structures), which may take 780  
tens of gigabytes of memory per individual connec- 781  
tome. 782

#### 783 4.5. Implications on atlas resolution

784 Our results highlight the impact of CSS on structural  
785 connectomes mapped both at the high resolution of  
786 individual surface vertices, and the lower resolution  
787 of a brain atlas. While the findings vary in terms of  
788 magnitude of influence, a common pattern is visible  
789 across resolutions: higher FWHM results in a more  
790 reliable connectome, yet higher FWHM reduces the  
791 identifiability of connectomes. We developed compu-  
792 tationally efficient methods to perform CSS at both  
793 resolutions. Atlas-based connectivity matrices have  
794 a relatively small memory footprint ( $<$ 1MB), and thus  
795 they can be processed and stored efficiently, regard-  
796 less of the level of smoothing. Similar to the high-  
797 resolution connectomes, when using an atlas par-  
798 cellation, probabilistic and deterministic tractogra-  
799 phy approaches have complementary attributes when  
800 comparing reliability and identifiability: connectomes  
801 mapped from probabilistic tractography achieve bet-  
802 ter reliability compared to their deterministic coun-  
803 terparts, whereas deterministic connectomes can bet-  
804 ter reveal individual differences. This is one possible  
805 factor that can guide the choice between deterministic  
806 and probabilistic tractography algorithms. However,  
807 CSS can be used to increase the reliability of con-  
808 nectomes mapped from deterministic tractography to  
809 match the reliability of the probabilistic approach.

810 Finally, the atlas-based smoothing results suggest  
811 that probabilistic maps are to a certain extent repre-  
812 sentative of highly smoothed deterministic ones. In  
813 other words, more smoothed deterministic maps were  
814 analogous to less smoothed probabilistic maps, as the  
815 probabilistic evaluation curves in Fig. 7 seem to be  
816 a continuation of the deterministic curves. This obser-  
817 vation is in agreement with prior expectations given  
818 the mechanisms used to generate the data, as proba-  
819 bilistic tractography-based connectivity has an intrin-  
820 sic spatial smoothness due to the stochastic variabil-  
821 ity in streamline propagation. The proposed method  
822 to perform CSS on atlas-based connectomes does  
823 not require construction of any intermediate high-  
824 resolution connectomes and is a fast operation rela-  
825 tive to the time required to perform whole-brain trac-  
826 tography. Thus, while the benefits of spatial smooth-  
827 ing for atlas-based connectomes were modest, we rec-  
828 ommend including CSS in future connectome map-  
829 ping workflows. 829

#### 830 4.6. CSS and principals of spatial smoothing

831 Our proposed connectome spatial smoothing ap-  
832 proach is an extension of spatial signal smoothing to  
833 networks, and hence, fundamental concepts within  
834 the domain of spatial smoothing are applicable to  
835 CSS. For instance, from a signal processing perspec-  
836 tive, the matched filter theorem states that spatial  
837 smoothing by an appropriate Gaussian kernel equal-  
838 izes the voxel-wise standard deviation and, in turn,  
839 yields an optimal sensitivity to detect effects of un-  
840 known extent [77, 78]. Additionally, with regards  
841 to single-subject inference, such smoothing facilitates  
842 the application of multiple comparison correction us-  
843 ing random field theory [77–79] and finally, smoothing  
844 mitigates residual anatomical variability of individu-  
845 als at the group-level. These concepts are equally ap-  
846 plicable to CSS, wherein, a matrix multiplication with  
847 a smoothing kernel achieves a similar purpose to con-  
848 volution of image data with a 3D spatial smoothing  
849 kernel; as a result, CSS can be utilized to (i) max-  
850 imize connectivity SNR through appropriate filter  
851 selection, (ii) improve single-subject inference, and  
852 (iii) improve the reliability of group level connectivity  
853 analyses. This poses an interesting future research di-  
854 rection to explore the benefits of CSS for whole-brain  
855 high-resolution network inference in which voxel-wise  
856 approaches [31, 79–81] are combined with network-  
857 based approaches [30].

#### 859 4.7. Broad applicability of CSS

860 This study exclusively evaluated the merits of CSS for  
861 a measure of streamline count extracted from struc-  
862 tural connectivity. However, the applicability of CSS  
863 extends beyond streamline counts to other diffusion-  
864 derived measures of connectivity, such as connection  
865 density [82], mean streamline length, and values sam-  
866 pled from quantitative diffusion model measures, e.g.  
867 the mean fractional anisotropy [83]. We note however  
868 that some care would be necessary if applying the  
869 method to metrics where the absence of a connection  
870 and a value of zero should not be treated equally.

871 Furthermore, its important to note that CSS is also  
872 applicable to brain networks derived from other imag-  
873 ing modalities. Functional connectivity (FC) gener-  
874 ated from fMRI time-series data using e.g. Pearson’s  
875 correlation is one such example. Interestingly, CSS  
876 formulation can be applied to fMRI time-series to  
877 construct an equivalent smoothed FC with a moder-  
878 ate improvement in computational performance rela-  
879 tive to traditional fMRI smoothing approaches (see  
880 Supplementary Information Section S.6. [Smoothing  
881 functional connectivity with CSS](#) for detail). This  
882 equivalence presents CSS as a fundamental general-  
883 ization of image spatial smoothing that extends spa-  
884 tial smoothing to connectivity matrices.

#### 885 4.8. Limitations

886 The main aim of this study was to evaluate the ben-  
887 efits of CSS for both high-resolution and atlas con-  
888 nectomes, but not to set a precedent for connectome  
889 construction decisions. Future work is needed to es-  
890 tablish best practices in mapping high-resolution con-  
891 nectomes.

892 Following an earlier implementation [32], this study  
893 used a nearest endpoint assignment approach to map  
894 streamline endpoints to high-resolution vertices. The  
895 connectome construction process could be made more  
896 robust by e.g. terminating streamlines more precisely  
897 as they transition the grey-white interface surface and  
898 assigning them to the nearest vertex on that surface.  
899 However, the extent of the potential benefit and the  
900 computational complexity of implementing this pro-  
901 cedure needs to be evaluated in future works.

902 Furthermore, it is important to note that the areal  
903 inequalities present in the fsLR-32k surface mesh  
904 can impose biases in connectome construction **and**  
905 **alternative approaches could mitigate this limita-**  
906 **tion** [33, 37] (see Supplementary Information Sec-  
907 tion S.7. [Areal inequalities of the surface mesh](#)  
908 for detail). While evaluating ramifications of such in-  
909 equalities falls beyond the scope of this paper, future  
910 research should study the implications of these in-  
911 equalities and propose appropriate correction strate-  
912 gies to alleviate areal connectivity biases.

#### 913 4.9. Concluding remarks

914 In this study, we developed a novel formalism for  
915 spatial smoothing of structural connectivity matrices  
916 and demonstrated the wide-ranging benefits of con-  
917 nectome smoothing. Our results indicate that CSS  
918 with different kernel FWHMs and truncation thresh-  
919 olds significantly impacts various characteristics of  
920 structural connectivity matrices. In high-resolution  
921 connectomes, smoothing up to 3-6mm FWHM was  
922 deemed favorable, though the choice of smoothing pa-  
923 rameters imposes a trade-off between reliability and  
924 individual identifiability. We provided recommenda-  
925 tions for smoothing parameter choices that achieve  
926 a compromise between reliability and identifiability.  
927 Our connectome smoothing method and associated  
928 recommendations can be incorporated into future  
929 structural connectivity mapping pipelines, enabling  
930 more reliable and better powered connectome analy-  
931 ses. Moreover, high-resolution structural connectiv-  
932 ity overcomes the known uncertainty and ambiguity  
933 in determination of brain parcellation, and so will be  
934 a powerful analysis framework moving forward; our  
935 demonstrated and evaluated smoothing framework is  
936 an essential tool in facilitating such, and we have  
937 made reasonable recommendations for how others can  
938 use it.

## 939 Data and code availability

940 All imaging data used in this study was sourced  
941 from the Human Connectome Project (HCP)  
942 ([www.humanconnectome.org](http://www.humanconnectome.org)). The bash scripts  
943 used to perform tractography using MRtrix3 [49]  
944 ([www.mrtrix.org](http://www.mrtrix.org)), as well as all Python code re-  
945 quired to perform CSS and map smoothed connec-  
946 tomes at either the resolution of vertices or an at-  
947 las, are provided in our git repository. This code  
948 repository can be accessed from [github.com/sina-](https://github.com/sina-mansour/connectome-based-smoothing)  
949 [mansour/connectome-based-smoothing](https://github.com/sina-mansour/connectome-based-smoothing). Addition-  
950 ally, to facilitate future research and promote open  
951 transparent practices in code-sharing [84–86], the  
952 codes for smoothing connectomes at high-resolution  
953 and atlas-resolution are released as a [standalone](#)  
954 [python package](#) [87].

## 955 Acknowledgments

956 Data were provided by the Human Connectome  
957 Project, WU-Minn Consortium (Principal Inves-  
958 tigators: David Van Essen and Kamil Ugurbil;  
959 1U54MH091657) funded by the 16 NIH Institutes  
960 and Centers that support the NIH Blueprint for  
961 Neuroscience Research; and by the McDonnell Cen-  
962 ter for Systems Neuroscience at Washington Univer-  
963 sity. The data analysis was supported by SPAR-  
964 TAN High Performance Computing System at the  
965 University of Melbourne [88], and also supported by  
966 use of the Melbourne Research Cloud (MRC) pro-  
967 viding Infrastructure-as-a-Service (IaaS) cloud com-  
968 puting to the University of Melbourne researchers  
969 through the NeCTAR Research Cloud, a collabora-  
970 tive Australian research platform supported by the  
971 National Collaborative Research Infrastructure Strat-  
972 egy. S.M.L. is funded by a Melbourne Research  
973 Scholarship. R.S. is supported by fellowship funding  
974 from the National Imaging Facility (NIF), an Aus-  
975 tralian Government National Collaborative Research  
976 Infrastructure Strategy (NCRIS) capability. A.Z. was  
977 supported by a senior research fellowship from the  
978 NHMRC (APP1118153).

## 979 Author contributions

980 **S.M.L.:** Conceptualization, Methodology, Formal  
981 analysis, Data curation, Software, Writing - original  
982 draft, Writing - review & editing **C.S.:** Conceptu-  
983 alization, Writing - original draft, Writing - review  
984 & editing **R.S.:** Conceptualization, Writing - original  
985 draft, Writing - review & editing **A.Z.:** Supervision,  
986 Conceptualization, Writing - original draft, Writing -  
987 review & editing

## 988 Competing interests

989 The authors declare no competing interests.

## References

1. Poldrack, R. A., Nichols, T. & Mumford, J. Handbook of Functional MRI Data Analysis. *Handbook of Functional MRI Data Analysis*, 774957 (2011). 991–994
2. Srinivasan, R. Methods to improve spatial resolution of EEG. *International journal of bioelectromagnetism* **1**, 107–116 (1999). 995–997
3. Carp, J. The secret lives of experiments: Methods reporting in the fMRI literature. *NeuroImage* **63**, 289–300 (2012). 998–1000
4. Higashi, H., Tanaka, T. & Tanaka, Y. Smoothing of spatial filter by graph Fourier transform for EEG signals. *2014 Asia-Pacific Signal and Information Processing Association Annual Summit and Conference, APSIPA 2014* (2014). 1001–1005
5. Zhang, X., Noah, J. A. & Hirsch, J. Separation of the global and local components in functional near-infrared spectroscopy signals using principal component spatial filtering. *Neurophotonics* **3**, 015004 (2016). 1006–1010
6. Han, X. *et al.* Reliability of MRI-derived measurements of human cerebral cortical thickness: The effects of field strength, scanner upgrade and manufacturer. *NeuroImage* **32**, 180–194 (2006). 1011–1015
7. Franke, K., Ziegler, G., Klöppel, S. & Gaser, C. Estimating the age of healthy subjects from T1-weighted MRI scans using kernel methods: Exploring the influence of various parameters. *NeuroImage* **50**, 883–892 (2010). 1016–1020
8. Valsasina, P. *et al.* Spatial normalization and regional assessment of cord atrophy: Voxel-based analysis of cervical cord 3D T1-weighted images. *American Journal of Neuroradiology* **33**, 2195–2200 (2012). 1021–1025
9. Parrish, T. B., Gitelman, D. R., LaBar, K. S. & Mesulam, M.-M. Impact of signal-to-noise on functional MRI. *Magnetic Resonance in Medicine* **44**, 925–932 (Dec. 2000). 1026–1029
10. Worsley, K. J. Spatial smoothing of autocorrelations to control the degrees of freedom in fMRI analysis. *NeuroImage* **26**, 635–641 (2005). 1030–1032
11. Friston, K. in *Statistical Parametric Mapping* 2006, 10–31 (Elsevier, 2007). 1033–1034
12. Kasper, L. *et al.* Matched-filter acquisition for BOLD fMRI. *NeuroImage* **100**, 145–160 (Oct. 2014). 1035–1037
13. Pajula, J. & Tohka, J. Effects of spatial smoothing on inter-subject correlation based analysis of FMRI. *Magnetic Resonance Imaging* **32**, 1114–1124 (2014). 1038–1041
14. Friston, K., Holmes, A., Poline, J.-B., Price, C. & Frith, C. Detecting Activations in PET and fMRI: Levels of Inference and Power. *NeuroImage* **4**, 223–235 (Dec. 1996). 1042–1045

- 1046 15. Reimold, M., Slifstein, M., Heinz, A., Mueller-  
1047 Schauenburg, W. & Bares, R. Effect of spatial  
1048 smoothing on t-maps: Arguments for going back  
1049 from t-maps to masked contrast images. *Journal*  
1050 *of Cerebral Blood Flow and Metabolism* **26**, 751–  
1051 759 (2006).
- 1052 16. Della Rosa, P. A. *et al.* A Standardized [18F]-  
1053 FDG-PET Template for Spatial Normalization  
1054 in Statistical Parametric Mapping of Dementia.  
1055 *Neuroinformatics* **12**, 575–593 (Oct. 2014).
- 1056 17. Greve, D. N. *et al.* Cortical surface-based anal-  
1057 ysis reduces bias and variance in kinetic model-  
1058 ing of brain PET data. *NeuroImage* **92**, 225–236  
1059 (2014).
- 1060 18. Barnes, G. R. & Hillebrand, A. Statistical flat-  
1061 tening of MEG beamformer images. *Human*  
1062 *Brain Mapping* **18**, 1–12 (2003).
- 1063 19. Pantazis, D., Nichols, T. E., Baillet, S. & Leahy,  
1064 R. M. A comparison of random field theory and  
1065 permutation methods for the statistical analysis  
1066 of MEG data. *NeuroImage* **25**, 383–394 (2005).
- 1067 20. Kilner, J. M. & Friston, K. J. Topological infer-  
1068 ence for EEG and MEG. *The Annals of Applied*  
1069 *Statistics* **4**, 1272–1290 (Sept. 2010).
- 1070 21. Ye, J. C., Tak, S., Jang, K. E., Jung, J. & Jang,  
1071 J. NIRS-SPM: Statistical parametric mapping  
1072 for near-infrared spectroscopy. *NeuroImage* **44**,  
1073 428–447 (2009).
- 1074 22. Tak, S., Uga, M., Flandin, G., Dan, I. & Penny,  
1075 W. D. Sensor space group analysis for fNIRS  
1076 data. *Journal of Neuroscience Methods* **264**,  
1077 103–112 (2016).
- 1078 23. Cox, R. W. AFNI: Software for analysis and  
1079 visualization of functional magnetic resonance  
1080 neuroimages. *Computers and Biomedical Re-*  
1081 *search* **29**, 162–173 (June 1996).
- 1082 24. Fischl, B. FreeSurfer. *NeuroImage* **62**, 774–781  
1083 (Aug. 2012).
- 1084 25. Jenkinson, M., Beckmann, C. F., Behrens, T. E.,  
1085 Woolrich, M. W. & Smith, S. M. FSL. *NeuroIm-*  
1086 *age* **62**, 782–790 (Aug. 2012).
- 1087 26. Friston, K. J. *et al.* Statistical parametric  
1088 maps in functional imaging: A general linear  
1089 approach. *Human Brain Mapping* **2**, 189–210  
1090 (1994).
- 1091 27. Hagmann, P. *et al.* Mapping the Structural Core  
1092 of Human Cerebral Cortex. *PLoS Biology* **6** (ed  
1093 Friston, K. J.) e159 (July 2008).
- 1094 28. Bullmore, E. & Sporns, O. Complex brain net-  
1095 works: Graph theoretical analysis of structural  
1096 and functional systems. *Nature Reviews Neuro-*  
1097 *science* **10**, 186–198 (2009).
- 1098 29. Fornito, A., Zalesky, A. & Breakspear, M. Graph  
1099 analysis of the human connectome: Promise,  
1100 progress, and pitfalls. *NeuroImage* **80**, 426–444  
1101 (2013).
30. Zalesky, A., Fornito, A. & Bullmore, E. T. 1102  
Network-based statistic: Identifying differences 1103  
in brain networks. *NeuroImage* **53**, 1197–1207 1104  
(Dec. 2010). 1105
31. Zalesky, A., Cocchi, L., Fornito, A., Murray, 1106  
M. M. & Bullmore, E. Connectivity differences 1107  
in brain networks. *NeuroImage* **60**, 1055–1062 1108  
(2012). 1109
32. Mansour L, S., Tian, Y., Yeo, B. T., Cropley, V. 1110  
& Zalesky, A. High-resolution connectomic fin- 1111  
gerprints: Mapping neural identity and behav- 1112  
ior. *NeuroImage* **229**, 117695 (Apr. 2021). 1113
33. Besson, P., Lopes, R., Leclerc, X., Derambure, 1114  
P. & Tyvaert, L. Intra-subject reliability of the 1115  
high-resolution whole-brain structural connec- 1116  
tome. *NeuroImage* **102**, 283–293 (2014). 1117
34. Atasoy, S., Donnelly, I. & Pearson, J. Human 1118  
brain networks function in connectome-specific 1119  
harmonic waves. *Nature Communications* **7**, 1120  
10340 (Apr. 2016). 1121
35. Atasoy, S. *et al.* Connectome-harmonic decom- 1122  
position of human brain activity reveals dynam- 1123  
ical repertoire re-organization under LSD. *Sci-* 1124  
*entific Reports* **7**, 1–18 (2017). 1125
36. Besson, P. *et al.* Whole-Brain High-Resolution 1126  
Structural Connectome: Inter-Subject Validat- 1127  
ion and Application to the Anatomical Segmen- 1128  
tation of the Striatum. *Brain Topography* **30**, 1129  
291–302 (May 2017). 1130
37. Taylor, P. N., Wang, Y. & Kaiser, M. Within 1131  
brain area tractography suggests local modular- 1132  
ity using high resolution connectomics. *Scien-* 1133  
*tific Reports* **7**, 39859 (Feb. 2017). 1134
38. Moyer, D., Gutman, B. A., Faskowitz, J., Jahan- 1135  
shad, N. & Thompson, P. M. Continuous rep- 1136  
resentations of brain connectivity using spatial 1137  
point processes. *Medical Image Analysis* **41**, 32– 1138  
39 (2017). 1139
39. Cole, M. *et al.* Surface-Based Connectivity Inte- 1140  
gration: An atlas-free approach to jointly study 1141  
functional and structural connectivity. *Human* 1142  
*Brain Mapping* **42**, 3481–3499 (Aug. 2021). 1143
40. Chen, X., Wang, Y., Kopetzky, S. J., Butz- 1144  
Ostendorf, M. & Kaiser, M. Connectivity within 1145  
regions characterizes epilepsy duration and 1146  
treatment outcome. *Human Brain Mapping* **42**, 1147  
3777–3791 (Aug. 2021). 1148
41. Van Essen, D. C. *et al.* The WU-Minn Human 1149  
Connectome Project: An overview. *NeuroImage* 1150  
**80**, 62–79 (2013). 1151
42. Van Essen, D. C. *et al.* The Human Connec- 1152  
tome Project: A data acquisition perspective. 1153  
*NeuroImage* **62**, 2222–2231 (2012). 1154
43. Uğurbil, K. *et al.* Pushing spatial and tempo- 1155  
ral resolution for functional and diffusion MRI 1156  
in the Human Connectome Project. *NeuroImage* 1157  
**80**, 80–104 (2013). 1158

- 1159 44. Glasser, M. F. *et al.* The minimal preprocessing  
1160 pipelines for the Human Connectome Project.  
1161 *NeuroImage* **80**, 105–124 (2013).
- 1162 45. Van Essen, D. C., Glasser, M. F., Dierker, D. L.,  
1163 Harwell, J. & Coalson, T. Parcellations and  
1164 hemispheric asymmetries of human cerebral cortex  
1165 analyzed on surface-based atlases. *Cerebral*  
1166 *Cortex* **22**, 2241–2262 (2012).
- 1167 46. Margulies, D. S., Böttger, J., Watanabe, A. &  
1168 Gorgolewski, K. J. Visualizing the human connectome.  
1169 *NeuroImage* **80**, 445–461 (Oct. 2013).
- 1170 47. Mueller, S. *et al.* Individual Variability in Functional  
1171 Connectivity Architecture of the Human Brain. *Neuron* **77**,  
1172 586–595 (2013).
- 1173 48. Glasser, M. F. *et al.* A multi-modal parcellation  
1174 of human cerebral cortex. *Nature* **536**, 171–178  
1175 (Aug. 2016).
- 1176 49. Tournier, J.-D. *et al.* MRtrix3: A fast, flexible  
1177 and open software framework for medical image  
1178 processing and visualisation. *NeuroImage* **202**,  
1179 116137 (Nov. 2019).
- 1180 50. Dhollander, T., Raffelt, D. & Connelly, A. *Un-*  
1181 *supervised 3-tissue response function estimation*  
1182 *from single-shell or multi-shell diffusion MR*  
1183 *data without a co-registered T1 image in ISMRM*  
1184 *Workshop on Breaking the Barriers of Diffusion*  
1185 *MRI* (2016), 5.
- 1186 51. Tournier, J. D., Calamante, F., Gadian, D. G. &  
1187 Connelly, A. Direct estimation of the fiber orientation  
1188 density function from diffusion-weighted  
1189 MRI data using spherical deconvolution. *NeuroImage* **23**,  
1190 1176–1185 (2004).
- 1191 52. Jeurissen, B., Tournier, J. D., Dhollander, T.,  
1192 Connelly, A. & Sijbers, J. Multi-tissue constrained  
1193 spherical deconvolution for improved  
1194 analysis of multi-shell diffusion MRI data. *NeuroImage* **103**,  
1195 411–426 (2014).
- 1196 53. Tournier, J. D., Calamante, F. & Connelly, A.  
1197 Improved probabilistic streamlines tractography  
1198 by 2 nd order integration over fibre orientation  
1199 distributions. *Ismrm* **88**, 2010 (2010).
- 1200 54. Tournier, J. D., Calamante, F. & Connelly, A.  
1201 MRtrix: Diffusion tractography in crossing fiber  
1202 regions. *International Journal of Imaging Systems and Technology* **22**,  
1203 53–66 (2012).
- 1204 55. Zhang, Y., Brady, M. & Smith, S. Segmentation  
1205 of brain MR images through a hidden Markov  
1206 random field model and the expectation-maximization  
1207 algorithm. *IEEE Transactions on Medical Imaging* **20**,  
1208 45–57 (2001).
- 1209 56. Patenaude, B., Smith, S. M., Kennedy, D. N. &  
1210 Jenkinson, M. A Bayesian model of shape and  
1211 appearance for subcortical brain segmentation.  
1212 *NeuroImage* **56**, 907–922 (2011).
- 1213 57. Mitchell, J. S. B., Mount, D. M. & Papadimitriou, C. H. The Discrete Geodesic Problem. *SIAM Journal on Computing* **16**, 647–668 (Aug. 1987).
- 1214  
1215  
1216
- 1217 58. Finn, E. S. *et al.* Functional connectome fingerprinting: identifying individuals using patterns of brain connectivity. *Nature Neuroscience* **18**,  
1218 1664–1671 (Nov. 2015).  
1219  
1220
- 1221 59. Amico, E. & Goñi, J. The quest for identifiability in human functional connectomes. *Scientific Reports* **8**, 1–14 (2018).  
1222  
1223
- 1224 60. Hopfinger, J. B., Büchel, C., Holmes, A. P. & Friston, K. J. A study of analysis parameters that influence the sensitivity of event-related fMRI analyses. *NeuroImage* **11**, 326–333 (2000).  
1225  
1226  
1227
- 1228 61. White, T. *et al.* Anatomic and Functional Variability: The Effects of Filter Size in Group fMRI Data Analysis. *NeuroImage* **13**, 577–588 (Apr. 2001).  
1229  
1230  
1231
- 1232 62. Geissler, A. *et al.* Influence of fMRI smoothing procedures on replicability of fine scale motor localization. *NeuroImage* **24**, 323–331 (Jan. 2005).  
1233  
1234
- 1235 63. Fransson, P., Merboldt, K. D., Petersson, K. M., Ingvar, M. & Frahm, J. On the effects of spatial filtering - A comparative fMRI study of episodic memory encoding at high and low resolution. *NeuroImage* **16**, 977–984 (2002).  
1236  
1237  
1238  
1239
- 1240 64. Mikl, M. *et al.* Effects of spatial smoothing on fMRI group inferences. *Magnetic Resonance Imaging* **26**, 490–503 (2008).  
1241  
1242
- 1243 65. Tian, Y., Margulies, D. S., Breakspear, M. & Zalesky, A. Topographic organization of the human subcortex unveiled with functional connectivity gradients. *Nature Neuroscience* **23**, 1421–1432 (Nov. 2020).  
1244  
1245  
1246  
1247
- 1248 66. Cohen, J. *Statistical Power Analysis for the Behavioral Sciences* 2nd (Lawrence Erlbaum Associates, 1988).  
1249  
1250
- 1251 67. Sarwar, T., Ramamohanarao, K. & Zalesky, A. Mapping connectomes with diffusion MRI: deterministic or probabilistic tractography? *Magnetic Resonance in Medicine* **81**, 1368–1384 (2019).  
1252  
1253  
1254  
1255
- 1256 68. Bucci, M. *et al.* Quantifying diffusion MRI tractography of the corticospinal tract in brain tumors with deterministic and probabilistic methods. *NeuroImage: Clinical* **3**, 361–368 (2013).  
1257  
1258  
1259
- 1260 69. Thomas, C. *et al.* Anatomical accuracy of brain connections derived from diffusion MRI tractography is inherently limited. *Proceedings of the National Academy of Sciences* **111**, 16574–16579 (Nov. 2014).  
1261  
1262  
1263  
1264

- 1265 70. Petersen, M. V. *et al.* Probabilistic versus de- 1321  
1266 terministic tractography for delineation of the 1322  
1267 cortico-subthalamic hyperdirect pathway in pa- 1323  
1268 tients with Parkinson disease selected for deep 1324  
1269 brain stimulation. *Journal of Neurosurgery* **126**,  
1270 1657–1668 (May 2017).
- 1271 71. Zalesky, A. *et al.* Disrupted axonal fiber con- 1326  
1272 nectivity in schizophrenia. *Biological Psychiatry*  
1273 **69**, 80–89 (2011).
- 1274 72. Lo, Y.-C. *et al.* The loss of asymmetry and 1327  
1275 reduced interhemispheric connectivity in ado- 1328  
1276 lescents with autism: A study using diffusion 1329  
1277 spectrum imaging tractography. *Psychiatry Re-*  
1278 *search: Neuroimaging* **192**, 60–66 (Apr. 2011).
- 1279 73. Schulte, T., Müller-Oehring, E., Sullivan, E. & 1330  
1280 Pfefferbaum, A. White matter fiber compromise 1331  
1281 contributes differentially to attention and emo- 1332  
1282 tion processing impairment in alcoholism, HIV- 1333  
1283 infection, and their comorbidity. *Neuropsycholo-*  
1284 *gia* **50**, 2812–2822 (Oct. 2012).
- 1285 74. Cao, Q. *et al.* Probabilistic Diffusion Tracto- 1334  
1286 graphy and Graph Theory Analysis Reveal Ab- 1335  
1287 normal White Matter Structural Connectivity 1336  
1288 Networks in Drug-Naive Boys with Attention 1337  
1289 Deficit/Hyperactivity Disorder. *Journal of Neu-*  
1290 *roscience* **33**, 10676–10687 (June 2013).
- 1291 75. Beare, R. *et al.* Altered structural connectiv- 1338  
1292 ity in ADHD: a network based analysis. *Brain*  
1293 *Imaging and Behavior* **11**, 846–858 (June 2017).
- 1294 76. Inguanzo, A. *et al.* Impaired Structural Connec- 1339  
1295 tivity in Parkinson’s Disease Patients with Mild 1340  
1296 Cognitive Impairment: A Study Based on Prob- 1341  
1297 abilistic Tractography. *Brain Connectivity* **11**,  
1298 380–392 (June 2021).
- 1299 77. Worsley, K. J., Marrett, S., Neelin, P. & Evans,  
1300 A. C. Searching scale space for activation in  
1301 PET images. *Human Brain Mapping* **4**, 74–90  
1302 (1996).
- 1303 78. Worsley, K. J. *et al.* A unified statistical ap- 1342  
1304 proach for determining significant signals in im- 1343  
1305 ages of cerebral activation. *Human Brain Map-*  
1306 *ping* **4**, 58–73 (1996).
- 1307 79. Friston, K. J., Worsley, K. J., Frackowiak,  
1308 R. S. J., Mazziotta, J. C. & Evans, A. C. As-  
1309 ssuming the significance of focal activations using  
1310 their spatial extent. *Human Brain Mapping* **1**,  
1311 210–220 (1994).
- 1312 80. Poline, J.-B., Worsley, K., Evans, A. & Friston,  
1313 K. Combining Spatial Extent and Peak Intensity  
1314 to Test for Activations in Functional Imaging.  
1315 *NeuroImage* **5**, 83–96 (Feb. 1997).
- 1316 81. Hayasaka, S., Phan, K., Liberzon, I., Worsley,  
1317 K. J. & Nichols, T. E. Nonstationary cluster-  
1318 size inference with random field and permuta-  
1319 tion methods. *NeuroImage* **22**, 676–687 (June  
1320 2004).
82. Smith, R. E., Tournier, J. D., Calamante, F. & 1321  
1322 Connelly, A. SIFT2: Enabling dense quantita- 1323  
1324 tive assessment of brain white matter connectiv- 1324  
1325 ity using streamlines tractography. *NeuroImage*  
**119**, 338–351 (2015).
83. Basser, P. J. Inferring microstructural features 1326  
1327 and the physiological state of tissues from 1328  
1329 diffusion-weighted images. *NMR in Biomedicine*  
**8**, 333–344 (1995).
84. Gilmore, R. O., Diaz, M. T., Wyble, B. A. & 1330  
1331 Yarkoni, T. Progress toward openness, trans- 1331  
1332 parency, and reproducibility in cognitive neu- 1332  
1333 roscience. *Annals of the New York Academy of*  
1334 *Sciences*, 5–18 (2017).
85. Gleeson, P., Davison, A. P., Silver, R. A. & As- 1335  
1336 coli, G. A. A Commitment to Open Source in 1336  
1337 Neuroscience. *Neuron* **96**, 964–965 (2017).
86. Smout, C. *et al.* An open code pledge for the 1338  
1339 neuroscience community. *MetaArXiv* (2021).
87. Mansour L., S., Seguin, C., Smith, R. E. & Za- 1340  
1341 lesky, A. Connectome Spatial Smoothing v.0.1.1 1341  
1342 (v.0.1.1). *Zenodo* (2021).
88. Meade, B., Lafayette, L., Sauter, G. & Tosello,  
1343 D. *Spartan HPC-Cloud Hybrid: Delivering Per-*  
1344 *formance and Flexibility* 2017.
89. Delingette, H. *Simplex meshes: a general rep-*  
1345 *resentation for 3D shape reconstruction in Pro-*  
1346 *ceedings of IEEE Conference on Computer Vi-*  
1347 *sion and Pattern Recognition CVPR-94* (IEEE  
1348 Comput. Soc. Press, 1994), 856–859.
90. Delingette, H. Simplex meshes : a general rep- 1349  
1350 resentation for 3D shape reconstruction. *HAL*  
1351 **RR-2214** (2006).
91. Irshad, H. & Gouaillard, A. Primal / Dual Mesh 1351  
1352 with Application to Triangular / Simplex Mesh 1352  
1353 and Delaunay / Voronoi. *Insight Journal*, 1–14  
1354 (2012).
92. Alexander-Bloch, A. F. *et al.* On testing for 1354  
1355 spatial correspondence between maps of human 1355  
1356 brain structure and function. *NeuroImage* **178**,  
1357 540–551 (2018).



## Supplementary Information

1362

### S.1. CSS for connectivity mapped on vertices vs. faces

1363

High-resolution connectivity maps are defined as spatial networks on the cortical surface mesh. Previous research represents the nodes of this network using either the vertices [32, 34, 35, 39, 46, 47] or the faces (triangles) [33, 36, 37] of the surface mesh. While this study implemented CSS on a vertex-based high-resolution network, in this section, we demonstrate the duality between vertex-based and face-based connectivity representations and show that CSS could alternatively be applied on a face-based connectome representation. In the ensuing section, we first propose a primal-dual relationship that can be used to translate the vertex-based CSS definitions (primal representation) to a face-based CSS definition (dual representation).

1364

1365

1366

1367

1368

1369

1370

#### S.1.1. Primal-dual representation

1371

In the primal representation, the cortical surface is represented by a 3-dimensional triangular surface mesh defined by a set of vertices, and the triangulation scheme explaining how the surface curvature is constructed over vertices. This is the default representation normally provided in tools such as FreeSurfer. This space contains the following primal elements: i) a set of 0-dimensional coordinates of points called vertices, ii) a set of 1-dimensional line segments called edges which connect pairs of vertices together, iii) a set of 2-dimensional triangles called faces which consist of 3 edges each, and the collection of these triangles form a 3-dimensional surface representation.

1372

1373

1374

1375

1376

1377

1378

In the dual representation, each of these primal elements are mapped to a complementary dual element which form a dual 3-dimensional structure (a 2-simplex mesh [89]) such that a unique (1-1) mapping between the primal and dual representations is possible:

1379

1380

1381

- For every face in the primal, a vertex (0-dimensional element) is defined in the dual space positioned at the coordinate of the center of mass for that face. Along with this coordinate information, the normal vector of the primal face is also attributed to the dual vertex (this information is required to reconstruct the primal representation from the dual representation).
- For every edge in the primal, an edge (1-dimensional element) is defined in the dual space that connects the dual vertices associated to the primal triangles neighboring the primal edge. In other words, the dual edges connect the centers of mass of the neighboring primal faces.
- As a result, for every vertex in the primal, a dual representation is created by the set of dual representations of all primal edges connected to that primal vertex (a 2-face [90]). Basically, the dual representation is created by connecting the centers of mass of all triangles that the primal vertex is neighboring.

1382

1383

1384

1385

1386

1387

1388

1389

1390

1391

This forms a dual representation of the primal 3-dimensional surface in the form of a 2-simplex mesh (i.e. a 3-dimensional mesh in which every vertex is connected to 3 other vertices). This primal-dual representation is visualized on an example surface mesh in figure S1. A more detailed explanation of this primal-dual representation can be found elsewhere [89–91].

1392

1393

1394

1395

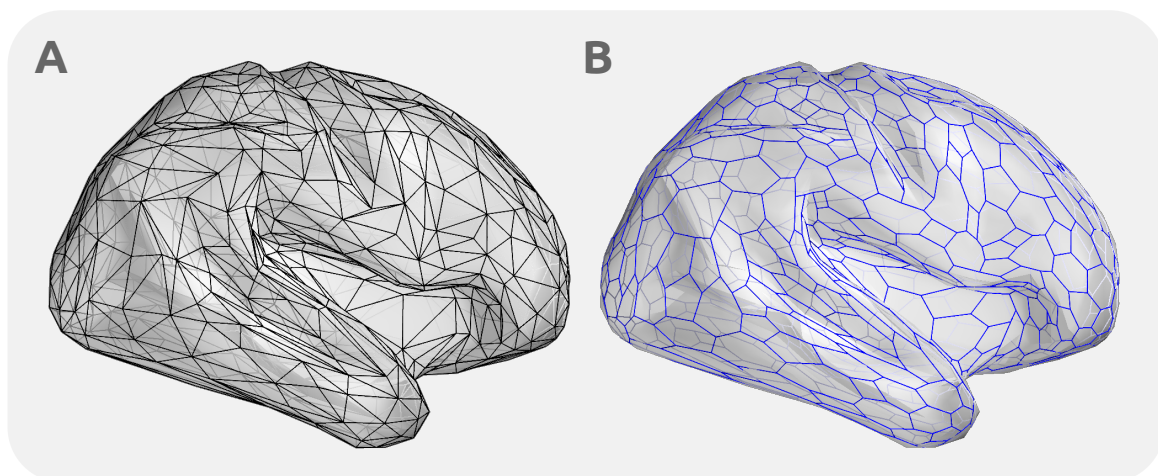

**Fig. S1.** The primal-dual representation of a sample 3-dimensional surface mesh. A simplified surface mesh was created by quadric metric error decimation of the inflated right cortical surface. (A) The primal surface representation is visualized by black edges connecting primal vertices to form the primal faces. (B) The dual representation is visualized by blue edges connecting the dual vertices (located at the centers of mass of primal faces) and forming the dual polygons.

1396 The dual representation provides a geometry to compute a spatial Gaussian smoothing kernel for face-based  
1397 connectomes. This kernel is defined according to the geodesic distances between the dual vertices encoding  
1398 primal faces in the dual representation. Hence, if high-resolution connectivity were to be mapped on a network  
1399 of faces, this alternative smoothing kernel could be used to perform CSS on the face-based connectome.

1400 In summary, high-resolution maps, when considered across all modalities and data formats used, are more  
1401 commonly defined vertex-wise. However, for structural connectivity mapping via tractography, streamline  
1402 intersections with faces arguably provide a more suitable native representation. Nevertheless, the natural  
1403 duality between vertex- and face-based representations facilitates conversions of methods tailored for one to  
1404 be applied to the other. In this study, we decided to prioritize the multimodal consistency of the mapped  
1405 high-resolution connectomes by using a vertex-based mapping approach.

## 1406 *S.2. Considerations for endpoint assignment*

1407  
1408 In this study we used a nearest-vertex check for endpoint assignment to high-resolution surface vertices (fsLR-  
1409 32k). After tractography and removal of streamlines ending far ( $> 2\text{mm}$ ) from cortical vertices, each streamline  
1410 endpoint was assigned to its closest vertex according to 3D euclidean distance metric. Here, we elaborate on  
1411 the implications of this choice and provide a comparison to other assignment approaches. An implication of this  
1412 selection for endpoint assignment method is the potential ambiguity in assignment boundaries. For the sake  
1413 of comparison, high-resolution structural connectome studies that assign endpoints to faces simply check for  
1414 the intersection of streamline at each endpoint with a surface mesh face. This provides a clear areal boundary  
1415 definition of assignment borders (Figure S2.A).

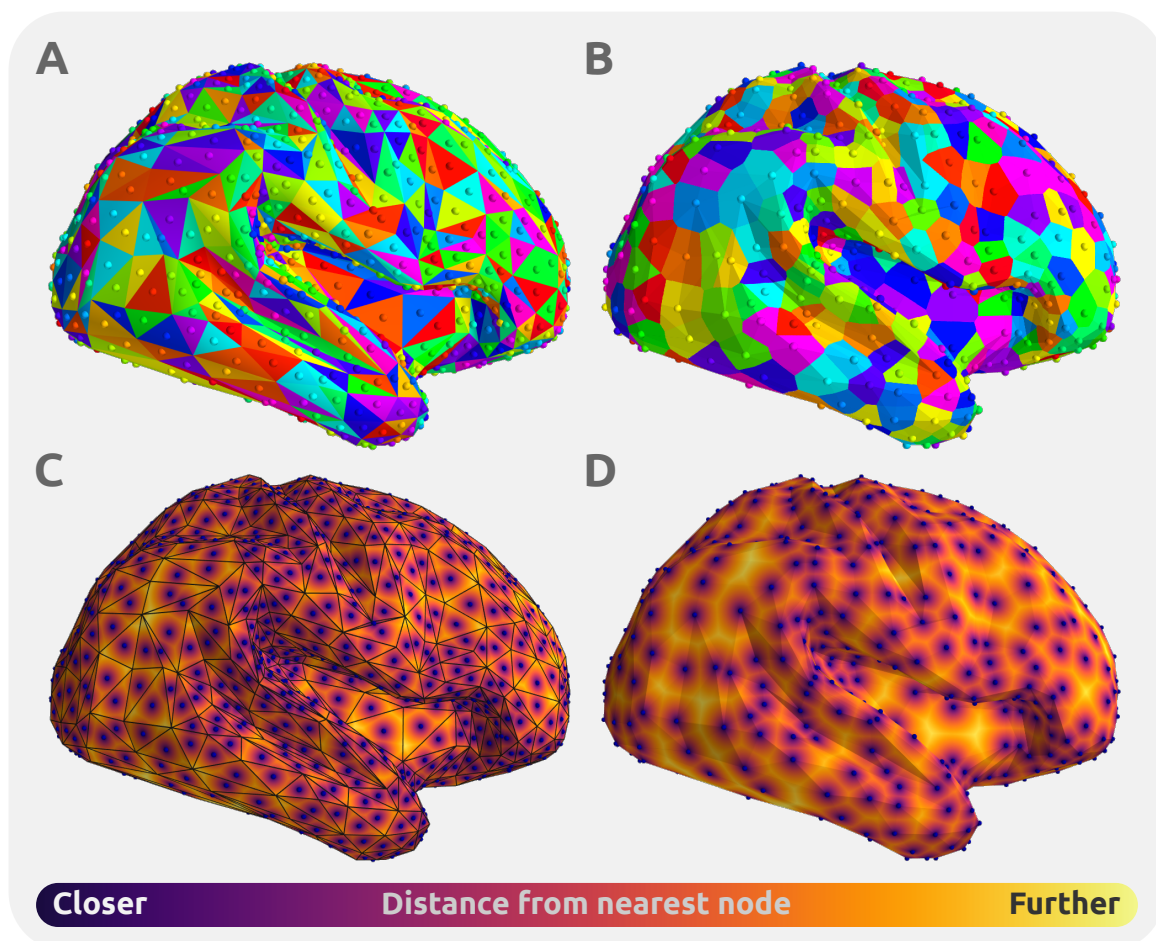

**Fig. S2.** Endpoint assignment areal boundaries. A simplified surface mesh created by quadric metric error decimation of the inflated right cortical surface was used as an example. (A) The face-based assignments are shown on the colored surface. The center of mass for each face is colored independently; the same color is also used to delineate the surface boundaries for streamline assignment with the intersection based approach. This approach assigns each streamline to the face it intersects with. (B) The vertex-based endpoint assignment used in this study is used to generate a similar coloring. Every vertex is independently colored, a Voronoi tessellation was projected on the surface mesh to delineate assignment boundaries for every vertex. (C) & (D) The distance of points on the surface mesh to their closest node is visualized such that higher distances are assigned a warmer color. The distances for the face intersection approach do not necessarily follow the assignment boundaries delineated by faces; Whereas, the nearest vertex assignments are designed to follow the distance boundaries by definition.

In the following, we discuss how the consequences of our endpoint assignment approach can be translated to a similar areal boundary definition resolving assignment ambiguities. 1416  
1417

Fundamentally, since the endpoints are treated as coordinates assigned to the closest vertices on the surface mesh, a Voronoi tessellation can be computed to evaluate the inclusion boundaries to assign an arbitrary endpoint to a vertex. This Voronoi tessellation can be projected to the surface mesh to delineate the assignment boundaries on the surface mesh. Figure S2.B presents how this area boundary could be defined for vertex-based streamline assignments on the triangular surface meshes. Furthermore, Figures S2.C,D projects the Euclidean distance from the closest node (vertex/face) along the surface manifold. These results suggest that the endpoint assignment by intersection approach previously used in face-based connectomes will not necessarily assign a streamline to the closest node (according to the distance metric). Hence, the two endpoint assignment approaches are different as one checks for the intersection of a streamline with a face on the surface, and the other assesses proximity to the closest vertex. Nonetheless, both approaches define a clear areal boundary along the surface mesh which can be used to evaluate streamline inclusion. These alternative approaches could also be theoretically expanded to the dual representation of the simplex mesh. In other words, if the aim is to generate vertex-based connectivity with an intersection based endpoint assignment, or to generate face-based connectivity with a nearest face assignment constraint, the dual surface representation can be used. 1418  
1419  
1420  
1421  
1422  
1423  
1424  
1425  
1426  
1427  
1428  
1429  
1430  
1431

### S.3. Thresholding radius 1432

This section provides the mathematical rationale behind the relationship between  $R$ ,  $\sigma$  (or alternatively FWHM), and  $\varepsilon$  presented in Equation 6. The truncation radius  $R$  was formulated as a function of  $\sigma$  and  $\varepsilon$  such that the proportion of signal loss for a 2-dimensional Gaussian kernel with the strength of  $\sigma$  truncated at a radius of  $R$  is equal to  $\varepsilon$ . Given that the Gaussian kernel was defined such that its total cumulative density is unity ( $\int_{-\infty}^{\infty} G(\delta) = 1$ ), the relationship between the smoothing parameters can be defined by the following integration over the 2-dimensional surface area: 1433  
1434  
1435  
1436  
1437  
1438

$$\varepsilon = 1 - \iint_{\delta < R} G(\delta) dA \quad (S1)$$

This integration can be solved in polar coordinates by the following closed form equation: 1439

$$\begin{aligned} 1 - \varepsilon &= \int_0^{2\pi} \int_0^R G(r, \theta) r dr d\theta \\ &= \int_0^{2\pi} \int_0^R \frac{1}{(\sqrt{2\pi}\sigma)^2} e^{-\frac{r^2}{2\sigma^2}} r dr d\theta \\ &= \int_0^R \frac{1}{\sigma^2} r e^{-\frac{r^2}{2\sigma^2}} dr \\ &= -e^{-\frac{r^2}{2\sigma^2}} \Big|_0^R \\ &= 1 - e^{-\frac{R^2}{2\sigma^2}} \end{aligned} \quad (S2)$$

And this can be used to describe  $R$  as a function of  $\sigma$  and  $\varepsilon$ : 1440

$$1 - \varepsilon = 1 - e^{-\frac{R^2}{2\sigma^2}} \longrightarrow \boxed{R = \sigma \sqrt{-2 \ln \varepsilon}} \quad (S3)$$

And given the relationship between FWHM and  $\sigma$  ( $\text{FWHM} = \sigma \sqrt{8 \ln 2}$ ), this equation can be rewritten based on FWHM: 1441  
1442

$$\boxed{R(\text{FWHM}, \varepsilon) = \text{FWHM} \sqrt{-\log_2 \varepsilon}} \quad (S4)$$

### S.4. CSS for atlas-based connectivity 1443

In the main text, it was briefly mentioned that mapping the high-resolution connectivity is not necessary for smoothing the connectivity matrices at an atlas resolution: alternatively, a smoothed version of an atlas-based connectivity matrix can be derived from a soft parcellation, which is derived by applying spatial smoothing to the parcels of the brain atlas (and normalizing each vertex to a unity sum of parcel memberships). In this 1444  
1445  
1446  
1447

1448 section, we provide the formal proof of this equivalence: first, downsampling a high-resolution connectivity  
 1449 matrix to an atlas-based connectome matrix is formulated by linear algebraic formulations; these formulations  
 1450 are then used to complete a formal proof of the equivalence.

1451 Following the prior nomenclature,  $A$  is a  $v \times v$  matrix denoting the high-resolution connectivity matrix where  
 1452  $v$  is the number of vertices. According to Equation 4, the smoothed high-resolution connectivity matrix  $A_s$   
 1453 is calculated as follows:

$$A_s = F_s A F_s^T \quad (S5)$$

1454 Where  $F_s$  is a  $v \times v$  column-normalized spatial smoothing kernel. A formal notion of a brain atlas can be  
 1455 denoted by  $p \times v$  matrix  $P$ , where  $p$  is the number of brain regions in the atlas. Elements  $P(i, j)$  encode the  
 1456 relationship between vertex/voxel  $v_i$  and region  $p_j$ .

$$P(i, j) = \begin{cases} 1, & \text{if } v_j \in p_i \\ 0, & \text{otherwise} \end{cases} \quad (S6)$$

1457 An atlas-resolution connectome  $A_p$  is a  $p \times p$  matrix, which is normally mapped from an atlas parcellation  
 1458 such that elements  $A_p(i, j)$  encode the aggregate contribution from those streamlines for which one endpoint  
 1459 is assigned to region  $p_i$  and the other endpoint is assigned to region  $p_j$  (showing here the streamline count for  
 1460 simplicity):

$$A_p(i, j) = \sum_{v_k \in p_i \& v_l \in p_j} A(k, l) \quad (S7)$$

1461 This notion can be formalized by the following matrix representation which can be used to derive  $A_p$  from  $A$   
 1462 and  $P$ :

$$A_p = P A P^T \quad (S8)$$

1463 Hence, the element  $A_p(i, j)$  counts the overall connectivity between regions  $p_i$  and  $p_j$  by adding all high-  
 1464 resolution connectivity edges between them. Equations S5 and S8 yield the following definition for the smoothed  
 1465 atlas-based connectivity  $A_{sp}$ :

$$A_{sp} = P A_s P^T = P F_s A F_s^T P^T = (P F_s) A (P F_s)^T \quad (S9)$$

1466 The matrix  $P F_s$  can thus be treated as a  $p \times v$  weighted soft parcellation map, i.e. a non-binary brain  
 1467 atlas. This soft parcellation can be used to generate smoothed connectomes based on an atlas parcellation (each  
 1468 streamline contributes to many connectome edges, based on all parcels with non-zero densities at both end-  
 1469 points) (see Equation S8). A key benefit of this approach is that it obviates the need to create computationally  
 1470 cumbersome high-resolution connectomes as an intermediate step in construction of lower-resolution connec-  
 1471 tome matrices. A different approach to compute this soft parcellation, that additionally does not necessitate  
 1472 computation of high-resolution smoothing matrix  $F_s$ , is further described in the ensuing sections.

#### 1473 S.4.1. Column normalization

1474 To describe the soft parcellation  $P F_s$ , a formal definition of normalizing every column should first be defined.  
 1475 Column normalization of an  $l \times m$  matrix  $B$  can be defined by the matrix multiplication of  $B$  with a diagonal  
 1476 norm matrix constructed from column sums.

1477 **Definition S.1.**  $\langle |B| \rangle$  denotes an  $m \times m$  diagonal column norm matrix constructed from  $B$  where  $\langle |B| \rangle(i, i)$  is  
 1478 the sum of the elements of the  $i$ th column in  $B$ :

$$\langle |B| \rangle(i, j) = \begin{cases} \sum_{\forall k} B(k, j), & \text{if } i = j \\ 0, & \text{if } i \neq j \end{cases} \quad (S10)$$

1479 Hence,

$$\langle |B| \rangle = \begin{bmatrix} \sum_{\forall k} B(k, 1) & 0 & \cdots & 0 \\ 0 & \sum_{\forall k} B(k, 2) & \cdots & 0 \\ \vdots & \vdots & \ddots & \vdots \\ 0 & 0 & \cdots & \sum_{\forall k} B(k, l) \end{bmatrix} \quad (S11)$$

1480 And a consequence of Definition S.1 is the statement in the next corollary.

**Corollary S.1.1.** Let  $z_i \in \mathbb{R}^i$  denote the vector of ones, i.e. all  $i$  vector elements equal 1. The following is true for any diagonal norm matrix: 1481  
1482

$$z_l B = z_m \langle |B| \rangle \quad (\text{S12})$$

Both sides of the equation above compute the column sums of  $B$ . Column normalization can be formally defined by the following theorem. 1483  
1484

**Theorem S.1.** The row normalization is a matrix transformation of an  $l \times m$  matrix  $B$  to an  $l \times m$  normalized matrix  $N(B)$ , such that the sum of every column in  $N(B)$  is equal to 1, i.e.  $z_l N(B) = z_m$ .  $N(B)$  can be derived by the following matrix multiplication: 1485  
1486  
1487

$$N(B) = B \langle |B| \rangle^{-1} \quad (\text{S13})$$

*Proof.* Corollary S.1.1 can be used to prove  $z_l N(B) = z_m$ : 1488

$$z_l N(B) = z_l B \langle |B| \rangle^{-1} = z_m \langle |B| \rangle \langle |B| \rangle^{-1} = z_m I_m = z_m$$

□ 1489

Where  $I_m$  is the  $m \times m$  identity matrix. The following remarks are a consequence of the aforementioned definitions and theorems. 1490  
1491

**Remark.** The diagonal norm matrix of a brain atlas parcellation  $\langle |P| \rangle$  is the  $v \times v$  identity matrix  $I_v$ , as every vertex belongs to a single atlas region and thus the sum of any column of  $P$  equals 1: 1492  
1493

$$\langle |P| \rangle = I_v \Rightarrow z_p P = z_v \quad (\text{S14})$$

Thus, for any arbitrary  $v \times v$  matrix  $X$ : 1494

$$\langle |PX| \rangle = \langle |X| \rangle \quad (\text{S15})$$

$\langle |PX| \rangle$ , by definition, is a diagonal matrix: 1495

$$z_v \langle |PX| \rangle = z_p P X \quad (\text{S16})$$

and from Equation S14 we know that: 1496

$$z_p P X = z_v X = z_v \langle |X| \rangle \quad (\text{S17})$$

Therefore,  $\langle |X| \rangle$  is the same diagonal matrix as  $\langle |PX| \rangle$ . In other words, the sum of the columns of  $PX$  is equal to the sum of the columns of  $X$ . 1497  
1498

**Remark.** The normalized high-resolution smoothing kernel  $F_s$  is defined from column normalization of the Gaussian kernel smoothing weights matrix  $F_G$  (from Equation S13): 1499  
1500

$$F_s = N(F_G) = F_G \langle |F_G| \rangle^{-1} \quad (\text{S18})$$

Where  $F_G$  is a symmetric  $v \times v$  matrix yielded from the truncated Gaussian function calculated upon the surface mesh: 1501  
1502

$$F_G(i, j) = \begin{cases} G(\delta_{ij}), & \text{if } \delta_{ij} < R(\text{FWHM}, \varepsilon) \\ 0, & \text{otherwise} \end{cases} \quad (\text{S19})$$

#### S.4.2. Smoothed brain atlas 1503

Equation S9 showed that a smoothed soft parcellation  $P_s = P F_s$  can be used to directly derive smoothed atlas connectivity maps from tractography. In this section, a formal proof will be provided for the following statement: 1504  
1505  
1506

**Theorem S.2.** The smoothed soft parcellation  $P_s = P F_s$  can be computed in the absence of  $F_s$ , by separately smoothing every row of  $P$ , followed by normalizing every column of the smoothed parcellation: 1507  
1508

$$P_s = N(P F_G) \quad (\text{S20})$$

1509 *Proof.* Using the previously derived equations, we prove that  $P_s = N(PF_G)$ :

$$\begin{aligned}
 P_s &= PF_s && \text{: from Equation S9} \\
 &= PF_G \langle |F_G| \rangle^{-1} && \text{: from Equation S18} \\
 &= PF_G \langle |PF_G| \rangle^{-1} && \text{: from Equation S15} \\
 &= N(PF_G) && \text{: from Equation S13}
 \end{aligned}$$

1510

□

1511 The proof above confirms that structural connectivity based on a parcellation atlas, incorporating CSS, can  
 1512 be constructed directly from a tractogram and soft parcellation, without necessitating computation of either the  
 1513 high-resolution smoothing matrix or the high-resolution connectome. To smooth an atlas-resolution connectome,  
 1514 the brain atlas  $P$  should first be transformed to a normalized smoothed soft parcellation  $P_s = N(PF_G)$ .  $PF_G$  is  
 1515 equivalent to independently smoothing the binary representation of each parcel, while the normalization of such  
 1516 ensures that the sum of parcel memberships of every vertex is 1. Hence, the soft-parcellation  $P_s$  can be computed  
 1517 by spatial smoothing and then be directly combined with the tractogram to produce a connectome: each  
 1518 streamline endpoint may have non-zero attribution to multiple parcels, and the contribution of the streamline  
 1519 to the connectome is therefore distributed across the set of edges associated with those two sets of parcels. This  
 1520 constitutes an approach to apply CSS on atlas-resolution connectomes that does not require any high-resolution  
 1521 connectomic computations.

### 1522 S.5. Replication of ROC curve estimates

1523 The computation of ROC curves reported in the manuscript relied on the assumption of a fixed false omission  
 1524 rate ( $\lambda = \frac{FN}{FN+TN}$ ). To ensure that the findings were not biased by the selected value for  $\lambda$ , the same analyses  
 1525 was repeated for a range of plausible values of  $\lambda \in \{10\%, 1\%, 0.1\%\}$ . Fig. S3 presents the results of this  
 1526 evaluation. The findings indicate that CSS increases the sensitivity of the statistical analyses and the inference  
 1527 power, particularly for connectomes mapped from probabilistic tractography, regardless of the selection made  
 1528 for the false omission rate  $\lambda$ .

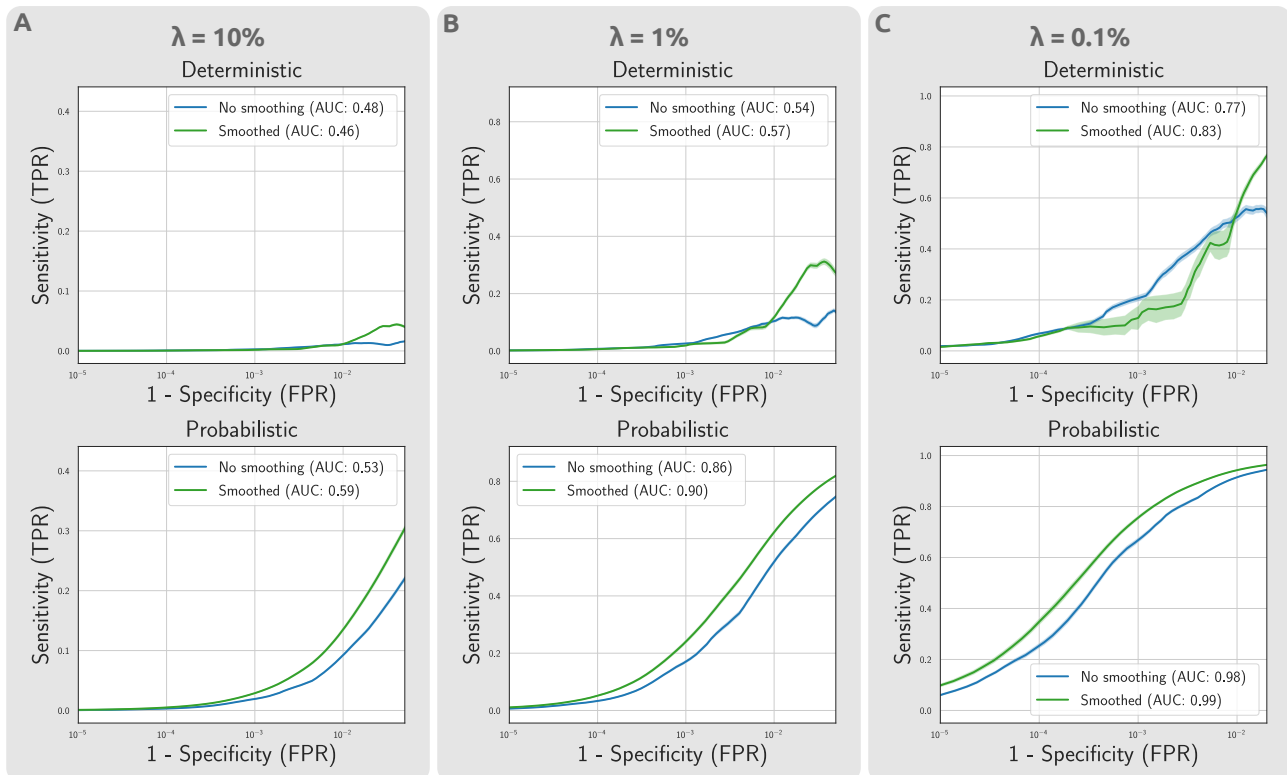

**Fig. S3.** Impact of CSS on statistical power of mass univariate testing on atlas-based connectomes, for different false omission rate assumptions. The estimated ROC curves demonstrate the respective changes in sensitivity and specificity of the suprathreshold edges at different effect thresholds. The analyses was repeated across a range of false omission rates to ensure the robustness of findings with regards to parameter selection. While absolute model performance estimate quantified by AUC depends on the false omission rate assumption, the findings with regards to the relative performance of methods are consistent across different false omission rates.

### S.6. Smoothing functional connectivity with CSS

In this section, we evaluate how the mathematical formulations of CSS could alternatively be used for smoothing functional connectivity (FC) matrices mapped at the resolution of a brain atlas. Formally, an fMRI time-series can be denoted by a  $v \times t$  matrix  $C$ , where  $t$  is the number of time-points in the fMRI data. Essentially, every row of matrix  $C$  contains the time-series of a single node in high-resolution.

Traditionally, to map smoothed FC matrices, this data is first smoothed with a Gaussian spatial smoothing kernel. Borrowing from CSS formulations, the smoothed time-series data  $C_s$  can be computed by a matrix multiplication of the time-series with the connectome smoothing kernel:

$$C_s = F_s C$$

Next, the spatially smoothed time-series is downsampled to the resolution of a brain atlas:

$$C_{sp} = P C_s$$

Finally, computing the Pearson's correlation between all pairs of regions (rows of  $C_{sp}$ ) generates the final FC matrix:

$$A_{sp}^{functional} = corr(C_{sp})$$

Where,  $corr$  denotes the function that computes row-wise correlations and  $A_{sp}^{functional}$  denotes the final FC matrix. Hence, the traditional procedure for mapping smoothed FC matrices can be represented by the following CSS notation:

$$A_{sp}^{functional} = corr(P(F_s C))$$

The atlas based simplification of CSS (see Supplementary Information Section S.4. CSS for atlas-based connectivity) could thus be used to speed up the traditional FC mapping pipelines. Instead of smoothing the fMRI time-series followed by downsampling to the atlas resolution, the unsmoothed fMRI time-series could be directly downsampled with a smoothed soft parcellation ( $P_s = P F_s$ ):

$$A_{sp}^{functional} = corr((P F_s) C) = corr(P_s C)$$

This alternative approach inspired by atlas-based CSS provides an improvement in computational complexity of smoothed FC mapping (from  $O(pv^2 + v^2t)$  to  $O(pv^2 + pvt)$  for a single FC). Furthermore, if smoothed FC is mapped for multiple individuals,  $P_s$  can be computed once for the group average template space. Hence, the amortized time complexity is reduced from the traditional complexity of  $O(pv^2 + v^2t)$  to  $O(\frac{pv^2}{N_s} + pvt)$ , where  $N_s$  is the number of individuals for whom FC is being mapped. Although this relatively moderate improvement may not justify modification of traditional FC mapping pipelines, it demonstrates how CSS can be viewed as a fundamental generalization of traditional spatial smoothing approaches to a connectivity domain.

1555

### 1556 *S.7. Areal inequalities of the surface mesh*

1557 This study used the vertices from fsLR-32k atlas to delineate high-resolution structural connectivity nodes. Us-  
1558 ing this delineation is beneficial due to its alignment to other properties extracted from neuroimaging scans, such  
1559 as cortical thickness, curvature, functional activation and connectivity, and cortical atlases. More importantly,  
1560 these surfaces are all registered to the same standard sphere and hence provide a 1-1 mapping of vertices across  
1561 individuals. Nevertheless, it is important to highlight the shortcomings of this surface mesh in the context of  
1562 high-resolution connectomic studies.

1563 As this surface was generated to closely follow the individual's curvature of the cortical WM surface for  
1564 volumetric preservation, the vertices are not necessarily distributed equidistantly on the cortical surface [37]  
1565 (similarly, as per Section S.1.1, the faces are not equiareally distributed on the surface). In this section we  
1566 evaluate the distance and areal inequalities of the fsLR-32k mesh to highlight the connectivity biases created  
1567 by such inequalities. High-resolution connectivity studies may benefit from correction of such biases to ensure  
1568 that any results reported are not impacted/contaminated by these inequalities.

1569 In order to investigate the effect of these biases, we computed two measures to indicate distance and area  
1570 inequalities observed in the fsLR-32k mesh. First, we computed the average distance between every vertex  
1571 and all of its direct neighbors, i.e. vertices sharing an explicit primal surface edge. Additionally, we computed  
1572 a vertex-based area measure by distributing the area of faces across the surrounding vertices on the surface.  
1573 This lumped vertex area quantified the areal inequalities of the surface mesh that could impact vertex-based  
1574 connectivity. Fig. S4.A,B shows the distribution of these measures for the surface of an exemplar individual.  
1575 Additionally Fig. S4.C,D shows the same measures averaged across all individuals (N=42). These results suggest  
1576 the existence of distance and areal inequalities along the fsLR-32k mesh that are mostly correlated such that  
1577 regions with higher intervertex distances contain triangles with higher areas. The group average results indicate  
1578 the inherent distance and areal biases of the fsLR-32K mesh, such that regions further from the center of the  
1579 original sphere (i.e. frontal, occipital, and temporal regions) tend to stretch more and thus have a higher area  
1580 and intervertex distance compared to regions closer to the center of original sphere (i.e. somatosensory and  
1581 motor cortices as well as medial and insular regions).

1582 Such inequalities may introduce inhomogeneity in the mapped connectomes and impact high-resolution  
1583 connectivity studies. To demonstrate the potential impacts of these inequalities on connectivity measures,  
1584 Fig. S4.E,F shows the correlation between weighted degree distribution (i.e. nodal strength) in the unsmoothed  
1585 connectome and the intervertex distance and vertex area variations. These results indicate a significant yet  
1586 modest association between both measures of distance ( $r = 0.089, p = 0.025$ ) and area ( $r = 0.124, p = 0.007$ )  
1587 with nodal strength (significance was evaluated by a non-parametric spin test [92]). This indicates that regions  
1588 with higher intervertex distance/area tend to have more streamlines assigned to the nodes within them. An  
1589 earlier high-resolution study [33] have suggested an areal normalization approach by which the high-resolution  
1590 connectivity edges indicating streamline counts were normalized by areas of the node pairs. The normalization  
1591 replaces every edge weight  $e_{ij}$  indicating streamline count between nodes  $v_i$  and  $v_j$  with a normalized edge  
1592 weight  $\frac{2\sqrt{e_{ij}}}{A_i + A_j}$ , where  $A_i$  and  $A_j$  denote the areas associated with nodes  $v_i$  and  $v_j$ . We tested to see if this  
1593 normalization method could reduce/remove the distance and areal biases in nodal strength (Fig. S4.G,H). Our  
1594 results indicate that after performing the suggested normalization, nodal strength was still significantly associ-  
1595 ated with both distance ( $r = -0.113, p < 0.001$ ) and area ( $r = 0.105, p < 0.001$ ). The only difference was in  
1596 the direction of the association, such that vertices with higher distance/area tended to have a lower normal-  
1597 ized connectivity. Future studies are needed to investigate areal and distance biases and propose alternative  
1598 normalization approaches that could remove/reduce the impacts of these biases.

1599 Another alternative solution used in previous studies is using isotropic remeshing to reduce the extent of areal  
1600 inequalities in the native surface mesh [37]. Nevertheless, implementing isotropic remeshing would require an  
1601 extra resampling step in order to carry vertex-wise comparisons across subjects. The extent of benefits of this  
1602 alternative approach was not evaluated in this study and requires future investigation.



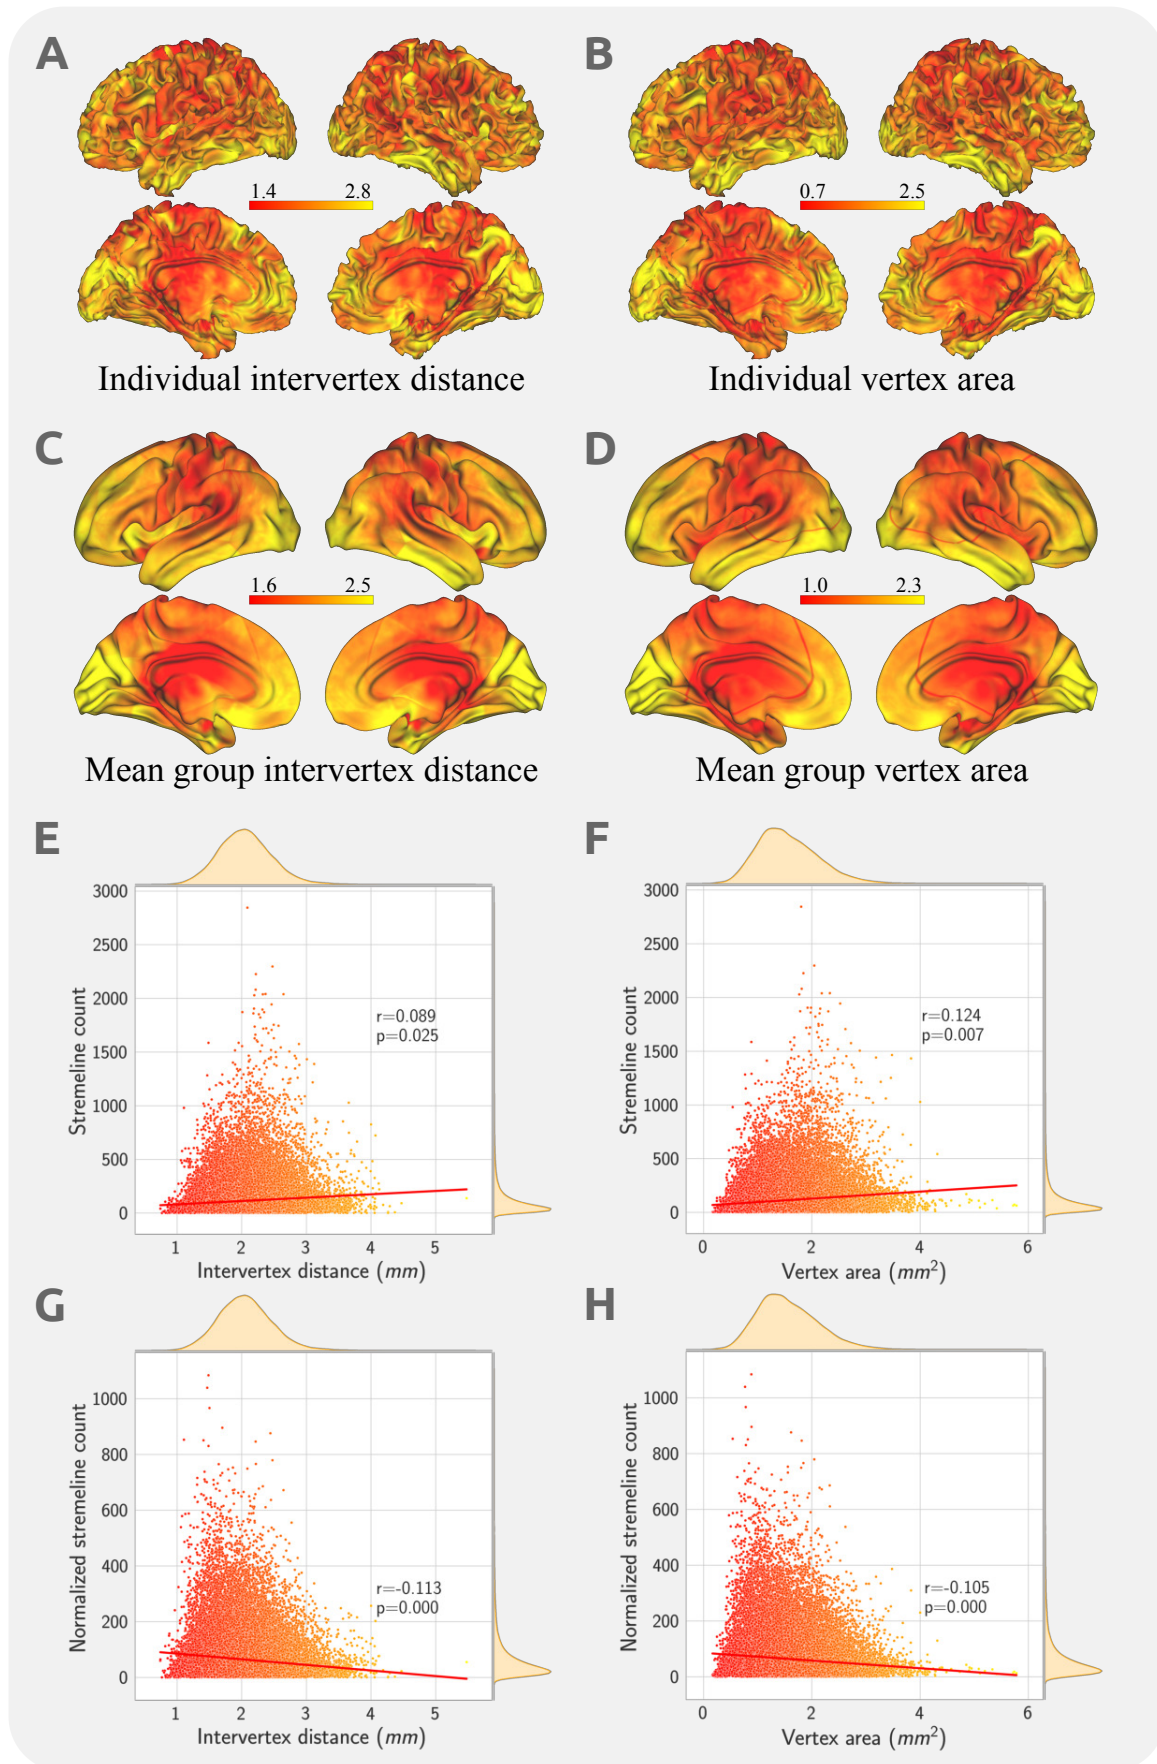

**Fig. S4.** Impact of distance and areal inequalities on high-resolution connectivity mapping. Panels (A) and (B) respectively show the intervertex distance and lumped vertex area inequalities projected over the same individual's WM fsLR-32K surface. Panels (C) and (D) show the inequalities averaged across the group (N=42) projected on the group-average WM surface. The group average maps indicate general biases that the frontal, occipital, and temporal regions are more stretched. Hence, vertices in these regions generally have higher associated area and intervertex distance. Panels (E) and (F) provide scatter plots with marginal distributions indicating the associations between distance and areal inequalities (shown in panel A,B) and nodal streamline count. The results indicate a modest yet significant impact of areal and distance inequality on streamline count. Statistical significance was evaluated by a non-parametric spin test. Panels (G) and (H) provide similar scatter plots for normalized streamline counts and show that the biases remain even after normalization.
